# Supplementary material for: Linking human behaviours and malaria vector biting risk in south-eastern Tanzania
Source: PLoS One. 2019 Jun 3;14(6):e0217414. doi: 10.1371/journal.pone.0217414 (PMC6546273; doi:10.1371/journal.pone.0217414)
Supplement: S5 File — (CSV) [file pone.0217414.s005.csv]

Hh_ID	Obs_day	village	tot_people	time	location	age	gender	#people	activity
901	1	Idete	3	1800-1829	Indoor	?5	Male	1	Playing
901	1	Idete	3	1800-1829	Indoor	?6	Female	1	Cooking
901	1	Idete	3	1800-1829	Outdoors	?6	Male	1	Stories no net
901	1	Idete	3	1830-1859	Indoor	?5	Male	1	Eating
901	1	Idete	3	1830-1859	Outdoors	?6	Female	1	Washing dishes
901	1	Idete	3	1830-1859	Indoor	?6	Male	1	Bathing
901	1	Idete	3	1900-1929	Outdoors	?5	Male	1	Playing
901	1	Idete	3	1900-1929	Outdoors	?6	Female	1	Cooking
901	1	Idete	3	1900-1929	Outdoors	?6	Male	1	Reading/studying
901	1	Idete	3	1930-1959	Outdoors	?5	Male	1	Playing
901	1	Idete	3	1930-1959	Outdoors	?6	Female	1	Washing dishes
901	1	Idete	3	1930-1959	Outdoors	?6	Male	1	Resting
901	1	Idete	3	2000-2029	Indoor	?5	Male	1	Sleeping in net
901	1	Idete	3	2000-2029	Indoor	?6	Female	1	Putting a child to sleep
901	1	Idete	3	2000-2029	Indoor	?6	Male	1	Reading/studying
901	1	Idete	3	2030-2059	Indoor	?5	Male	1	Sleeping in net
901	1	Idete	3	2030-2059	Outdoors	?6	Male	1	Resting
901	1	Idete	3	2030-2059	Outdoors	?6	Female	1	Resting
901	1	Idete	3	2100-2129	Indoor	?6	Male	1	Eating
901	1	Idete	3	2100-2129	Indoor	?6	Female	1	Eating
901	1	Idete	3	2100-2129	Indoor	?5	Male	1	Sleeping in net
901	1	Idete	3	2130-2159	Indoor	?6	Female	1	Sleeping in net
901	1	Idete	3	2130-2159	Indoor	?5	Male	1	Sleeping in net
901	1	Idete	3	2130-2159	Indoor	?6	Male	1	Reading/studying
901	1	Idete	3	2200-2229	Indoor	?6	Male	1	Sleeping in net
901	1	Idete	3	2200-2229	Indoor	?6	Female	1	Sleeping in net
901	1	Idete	3	2200-2229	Indoor	?5	Male	1	Sleeping in net
901	1	Idete	3	2230-2259	Indoor	?6	Male	1	Sleeping in net
901	1	Idete	3	2230-2259	Indoor	?6	Female	1	Sleeping in net
901	1	Idete	3	2230-2259	Indoor	?5	Male	1	Sleeping in net
901	1	Idete	3	2300-2329	Indoor	?6	Male	1	Sleeping in net
901	1	Idete	3	2300-2329	Indoor	?6	Female	1	Sleeping in net
901	1	Idete	3	2300-2329	Indoor	?5	Male	1	Sleeping in net
901	1	Idete	3	2330-2359	Indoor	?6	Male	1	Sleeping in net
901	1	Idete	3	2330-2359	Indoor	?6	Female	1	Sleeping in net
901	1	Idete	3	2330-2359	Indoor	?5	Male	1	Sleeping in net
901	1	Idete	3	0000-0029	Indoor	?6	Male	1	Sleeping in net
901	1	Idete	3	0000-0029	Indoor	?6	Female	1	Sleeping in net
901	1	Idete	3	0000-0029	Indoor	?5	Male	1	Sleeping in net
901	1	Idete	3	0030-0059	Indoor	?6	Male	1	Sleeping in net
901	1	Idete	3	0030-0059	Indoor	?6	Female	1	Sleeping in net
901	1	Idete	3	0030-0059	Indoor	?5	Male	1	Sleeping in net
901	1	Idete	3	0100-0129	Indoor	?6	Male	1	Sleeping in net
901	1	Idete	3	0100-0129	Indoor	?6	Female	1	Sleeping in net
901	1	Idete	3	0100-0129	Indoor	?5	Male	1	Sleeping in net
901	1	Idete	3	0130-0159	Indoor	?6	Male	1	Sleeping in net
901	1	Idete	3	0130-0159	Indoor	?6	Female	1	Sleeping in net
901	1	Idete	3	0130-0159	Indoor	?5	Male	1	Sleeping in net
901	1	Idete	3	0200-0229	Indoor	?6	Male	1	Sleeping in net
901	1	Idete	3	0200-0229	Indoor	?6	Female	1	Sleeping in net
901	1	Idete	3	0200-0229	Indoor	?5	Male	1	Sleeping in net
901	1	Idete	3	0230-0259	Indoor	?6	Male	1	Sleeping in net
901	1	Idete	3	0230-0259	Indoor	?6	Female	1	Sleeping in net
901	1	Idete	3	0230-0259	Indoor	?5	Male	1	Sleeping in net
901	1	Idete	3	0300-0329	Indoor	?6	Male	1	Sleeping in net
901	1	Idete	3	0300-0329	Indoor	?6	Female	1	Sleeping in net
901	1	Idete	3	0300-0329	Indoor	?5	Male	11	Sleeping in net
901	1	Idete	3	0330-0359	Indoor	?6	Male	1	Sleeping in net
901	1	Idete	3	0330-0359	Indoor	?6	Female	1	Sleeping in net
901	1	Idete	3	0330-0359	Indoor	?5	Male	1	Sleeping in net
901	1	Idete	3	0400-0429	Indoor	?6	Male	1	Sleeping in net
901	1	Idete	3	0400-0429	Indoor	?6	Female	1	Sleeping in net
901	1	Idete	3	0400-0429	Indoor	?5	Male	1	Sleeping in net
901	1	Idete	3	0430-0459	Indoor	?6	Male	1	Sleeping in net
901	1	Idete	3	0430-0459	Indoor	?6	Female	1	Sleeping in net
901	1	Idete	3	0430-0459	Indoor	?5	Male	1	Sleeping in net
901	1	Idete	3	0500-0529	Indoor	?6	Male	1	Sleeping in net
901	1	Idete	3	0500-0529	Indoor	?6	Female	1	Sleeping in net
901	1	Idete	3	0500-0529	Indoor	?5	Male	1	Sleeping in net
901	1	Idete	3	0530-0559	Indoor	?6	Male	1	Sleeping in net
901	1	Idete	3	0530-0559	Indoor	?6	Female	1	Sleeping in net
901	1	Idete	3	0530-0559	Indoor	?5	Male	1	Sleeping in net
901	1	Idete	3	0600-0629	Indoor	?6	Female	1	Sleeping in net
901	1	Idete	3	0600-0629	Indoor	?5	Male	1	Sleeping in net
901	1	Idete	3	0600-0629	Indoor	?6	Male	1	Reading/studying
901	1	Idete	3	0630-0659	Outdoors	?6	Female	1	Cooking
901	1	Idete	3	0630-0659	Outdoors	?6	Male	1	Sweeping
901	1	Idete	3	0630-0659	Outdoors	?5	Male	1	Brushing teeth
902	1	Idete	5	1800-1829	Away	?6	Male	1	Away
902	1	Idete	5	1800-1829	Away	?6	Female	3	Away
902	1	Idete	5	1800-1829	Outdoors	?6	Male	1	Resting
902	1	Idete	5	1830-1859	Away	?6	Male	1	Away
902	1	Idete	5	1830-1859	Away	?6	Female	3	Away
902	1	Idete	5	1830-1859	Outdoors	?6	Male	1	Resting
902	1	Idete	5	1900-1929	Outdoors	?6	Female	2	Cooking
902	1	Idete	5	1900-1929	Outdoors	?6	Male	2	Resting
902	1	Idete	5	1900-1929	Outdoors	?6	Female	1	Resting
902	1	Idete	5	1930-1959	Outdoors	?6	Male	1	Eating
902	1	Idete	5	1930-1959	Outdoors	?6	Female	2	Eating
902	1	Idete	5	1930-1959	Indoor	?6	Female	1	walking/passing
902	1	Idete	5	1930-1959	Outdoors	?6	Male	1	Resting
902	1	Idete	5	2000-2029	Away	?6	Male	1	Away
902	1	Idete	5	2000-2029	Away	?6	Female	1	Away
902	1	Idete	5	2000-2029	Outdoors	?6	Female	1	Cooking
902	1	Idete	5	2000-2029	Outdoors	?6	Male	1	Resting
902	1	Idete	5	2000-2029	Outdoors	?6	Female	1	Resting
902	1	Idete	5	2030-2059	Away	?6	Male	1	Away
902	1	Idete	5	2030-2059	Away	?6	Female	1	Away
902	1	Idete	5	2030-2059	Outdoors	?6	Male	1	Eating
902	1	Idete	5	2030-2059	Outdoors	?6	Female	2	Eating
902	1	Idete	5	2100-2129	Away	?6	Male	1	Away
902	1	Idete	5	2100-2129	Away	?6	Female	1	Away
902	1	Idete	5	2100-2129	Outdoors	?6	Female	1	Bathing
902	1	Idete	5	2100-2129	Outdoors	?6	Female	1	Sleeping no net
902	1	Idete	5	2100-2129	Outdoors	?6	Male	1	Resting
902	1	Idete	5	2130-2159	Outdoors	?6	Male	1	Stories no net
902	1	Idete	5	2130-2159	Outdoors	?6	Female	1	Stories no net
902	1	Idete	5	2130-2159	Indoor	?6	Male	1	Sleeping in net
902	1	Idete	5	2130-2159	Indoor	?6	Female	2	Sleeping in net
902	1	Idete	5	2200-2229	Indoor	?6	Male	1	Sleeping in net
902	1	Idete	5	2200-2229	Indoor	?6	Female	3	Sleeping in net
902	1	Idete	5	2200-2229	Outdoors	?6	Male	1	Resting
902	1	Idete	5	2230-2259	Indoor	?6	Male	2	Sleeping in net
902	1	Idete	5	2230-2259	Indoor	?6	Female	3	Sleeping in net
902	1	Idete	5	2300-2329	Indoor	?6	Male	2	Sleeping in net
902	1	Idete	5	2300-2329	Indoor	?6	Female	3	Sleeping in net
902	1	Idete	5	2330-2359	Indoor	?6	Male	2	Sleeping in net
902	1	Idete	5	2330-2359	Indoor	?6	Female	3	Sleeping in net
902	1	Idete	5	0000-0029	Indoor	?6	Male	2	Sleeping in net
902	1	Idete	5	0000-0029	Indoor	?6	Female	3	Sleeping in net
902	1	Idete	5	0030-0059	Indoor	?6	Male	2	Sleeping in net
902	1	Idete	5	0030-0059	Indoor	?6	Female	3	Sleeping in net
902	1	Idete	5	0100-0129	Indoor	?6	Male	2	Sleeping in net
902	1	Idete	5	0100-0129	Indoor	?6	Female	3	Sleeping in net
902	1	Idete	5	0130-0159	Indoor	?6	Male	2	Sleeping in net
902	1	Idete	5	0130-0159	Indoor	?6	Female	3	Sleeping in net
902	1	Idete	5	0200-0229	Indoor	?6	Male	2	Sleeping in net
902	1	Idete	5	0200-0229	Indoor	?6	Female	3	Sleeping in net
902	1	Idete	5	0230-0259	Indoor	?6	Male	2	Sleeping in net
902	1	Idete	5	0230-0259	Indoor	?6	Female	3	Sleeping in net
902	1	Idete	5	0300-0329	Indoor	?6	Male	2	Sleeping in net
902	1	Idete	5	0300-0329	Indoor	?6	Female	3	Sleeping in net
902	1	Idete	5	0330-0359	Indoor	?6	Male	2	Sleeping in net
902	1	Idete	5	0330-0359	Indoor	?6	Female	3	Sleeping in net
902	1	Idete	5	0400-0429	Indoor	?6	Male	2	Sleeping in net
902	1	Idete	5	0400-0429	Indoor	?6	Female	3	Sleeping in net
902	1	Idete	5	0430-0459	Indoor	?6	Male	2	Sleeping in net
902	1	Idete	5	0430-0459	Indoor	?6	Female	3	Sleeping in net
902	1	Idete	5	0500-0529	Indoor	?6	Male	2	Sleeping in net
902	1	Idete	5	0500-0529	Indoor	?6	Female	3	Sleeping in net
902	1	Idete	5	0530-0559	Indoor	?6	Male	1	Sleeping in net
902	1	Idete	5	0530-0559	Indoor	?6	Female	2	Sleeping in net
902	1	Idete	5	0530-0559	Outdoors	?6	Male	1	Resting
902	1	Idete	5	0600-0629	Indoor	?6	Male	1	Sleeping in net
902	1	Idete	5	0600-0629	Indoor	?6	Female	3	Sleeping in net
902	1	Idete	5	0600-0629	Outdoors	?6	Male	1	Resting
902	1	Idete	5	0630-0659	Outdoors	?6	Female	1	Washing dishes
902	1	Idete	5	0630-0659	Outdoors	?6	Female	1	Bathing
902	1	Idete	5	0630-0659	Outdoors	?6	Male	1	Resting
902	1	Idete	5	0630-0659	Outdoors	?6	Male	1	Sweeping
902	1	Idete	5	0630-0659	Outdoors	?6	Female	1	Sweeping
903	1	Idete	6	1800-1829	Away	?6	Male	1	Away
903	1	Idete	6	1800-1829	Away	?6	Female	1	Away
903	1	Idete	6	1800-1829	Outdoors	?6	Male	2	Playing
903	1	Idete	6	1800-1829	Outdoors	?6	Female	1	Cooking
903	1	Idete	6	1800-1829	Outdoors	?6	Male	1	Resting
903	1	Idete	6	1830-1859	Outdoors	?6	Male	1	Playing
903	1	Idete	6	1830-1859	Outdoors	?6	Male	1	Washing dishes
903	1	Idete	6	1830-1859	Outdoors	?6	Female	1	Bathing
903	1	Idete	6	1830-1859	Outdoors	?6	Male	1	Resting
903	1	Idete	6	1830-1859	Outdoors	?6	Female	1	Resting
903	1	Idete	6	1830-1859	Outdoors	?6	Male	1	Reading/studying
903	1	Idete	6	1900-1929	Outdoors	?6	Male	4	Resting
903	1	Idete	6	1900-1929	Outdoors	?6	Female	2	Resting
903	1	Idete	6	1930-1959	Outdoors	?6	Male	4	Resting
903	1	Idete	6	1930-1959	Outdoors	?6	Female	2	Resting
903	1	Idete	6	2000-2029	Outdoors	?6	Male	4	Eating
903	1	Idete	6	2000-2029	Outdoors	?6	Female	2	Eating
903	1	Idete	6	2030-2059	Indoor	?6	Male	3	Watching TV
903	1	Idete	6	2030-2059	Indoor	?6	Female	1	Watching TV
903	1	Idete	6	2030-2059	Outdoors	?6	Male	1	Resting
903	1	Idete	6	2030-2059	Outdoors	?6	Female	1	Resting
903	1	Idete	6	2100-2129	Indoor	?6	Male	4	Watching TV
903	1	Idete	6	2100-2129	Indoor	?6	Female	2	Watching TV
903	1	Idete	6	2130-2159	Indoor	?6	Male	3	Sleeping in net
903	1	Idete	6	2130-2159	Indoor	?6	Female	2	Sleeping in net
903	1	Idete	6	2130-2159	Indoor	?6	Male	1	Reading/studying
903	1	Idete	6	2200-2229	Indoor	?6	Male	4	Sleeping in net
903	1	Idete	6	2200-2229	Indoor	?6	Female	2	Sleeping in net
903	1	Idete	6	2230-2259	Indoor	?6	Male	4	Sleeping in net
903	1	Idete	6	2230-2259	Indoor	?6	Female	2	Sleeping in net
903	1	Idete	6	2300-2329	Indoor	?6	Male	4	Sleeping in net
903	1	Idete	6	2300-2329	Indoor	?6	Female	2	Sleeping in net
903	1	Idete	6	2330-2359	Indoor	?6	Male	4	Sleeping in net
903	1	Idete	6	2330-2359	Indoor	?6	Female	2	Sleeping in net
903	1	Idete	6	0000-0029	Indoor	?6	Male	4	Sleeping in net
903	1	Idete	6	0000-0029	Indoor	?6	Female	2	Sleeping in net
903	1	Idete	6	0030-0059	Indoor	?6	Male	4	Sleeping in net
903	1	Idete	6	0030-0059	Indoor	?6	Female	2	Sleeping in net
903	1	Idete	6	0100-0129	Indoor	?6	Male	4	Sleeping in net
903	1	Idete	6	0100-0129	Indoor	?6	Female	2	Sleeping in net
903	1	Idete	6	0130-0159	Indoor	?6	Male	4	Sleeping in net
903	1	Idete	6	0130-0159	Indoor	?6	Female	2	Sleeping in net
903	1	Idete	6	0200-0229	Indoor	?6	Male	4	Sleeping in net
903	1	Idete	6	0200-0229	Indoor	?6	Female	2	Sleeping in net
903	1	Idete	6	0230-0259	Indoor	?6	Male	4	Sleeping in net
903	1	Idete	6	0230-0259	Indoor	?6	Female	2	Sleeping in net
903	1	Idete	6	0300-0329	Indoor	?6	Male	4	Sleeping in net
903	1	Idete	6	0300-0329	Indoor	?6	Female	2	Sleeping in net
903	1	Idete	6	0330-0359	Indoor	?6	Male	4	Sleeping in net
903	1	Idete	6	0330-0359	Indoor	?6	Female	2	Sleeping in net
903	1	Idete	6	0400-0429	Indoor	?6	Male	4	Sleeping in net
903	1	Idete	6	0400-0429	Indoor	?6	Female	2	Sleeping in net
903	1	Idete	6	0430-0459	Indoor	?6	Male	4	Sleeping in net
903	1	Idete	6	0430-0459	Indoor	?6	Female	2	Sleeping in net
903	1	Idete	6	0500-0529	Indoor	?6	Male	4	Sleeping in net
903	1	Idete	6	0500-0529	Indoor	?6	Female	2	Sleeping in net
903	1	Idete	6	0530-0559	Indoor	?6	Male	4	Sleeping in net
903	1	Idete	6	0530-0559	Indoor	?6	Female	2	Sleeping in net
903	1	Idete	6	0600-0629	Indoor	?6	Male	3	Sleeping in net
903	1	Idete	6	0600-0629	Indoor	?6	Female	2	Sleeping in net
903	1	Idete	6	0630-0659	Away	?6	Male	3	Away
903	1	Idete	6	0630-0659	Away	?6	Female	2	Away
903	1	Idete	6	0630-0659	Outdoors	?6	Male	1	Bathing
904	1	Idete	7	1800-1829	Away	?6	Female	1	Away
904	1	Idete	7	1800-1829	Indoor	?6	Female	1	Cooking
904	1	Idete	7	1800-1829	Outdoors	?6	Male	3	Stories no net
904	1	Idete	7	1800-1829	Outdoors	?6	Female	2	Stories no net
904	1	Idete	7	1830-1859	Away	?6	Male	1	Away
904	1	Idete	7	1830-1859	Indoor	?6	Female	1	Cooking
904	1	Idete	7	1830-1859	Outdoors	?6	Male	2	Stories no net
904	1	Idete	7	1830-1859	Outdoors	?6	Female	3	Stories no net
904	1	Idete	7	1900-1929	Away	?6	Female	1	Away
904	1	Idete	7	1900-1929	Indoor	?6	Female	1	Cooking
904	1	Idete	7	1900-1929	Outdoors	?6	Male	3	Stories no net
904	1	Idete	7	1900-1929	Outdoors	?6	Female	2	Stories no net
904	1	Idete	7	1930-1959	Away	?6	Male	1	Away
904	1	Idete	7	1930-1959	Away	?6	Female	2	Away
904	1	Idete	7	1930-1959	Indoor	?6	Female	1	Cooking
904	1	Idete	7	1930-1959	Outdoors	?6	Male	2	Stories no net
904	1	Idete	7	1930-1959	Outdoors	?6	Female	1	Stories no net
904	1	Idete	7	2000-2029	Away	?6	Male	1	Away
904	1	Idete	7	2000-2029	Away	?6	Female	2	Away
904	1	Idete	7	2000-2029	Indoor	?6	Female	1	Cooking
904	1	Idete	7	2000-2029	Outdoors	?6	Male	2	Stories no net
904	1	Idete	7	2000-2029	Outdoors	?6	Female	1	Stories no net
904	1	Idete	7	2030-2059	Away	?6	Male	1	Away
904	1	Idete	7	2030-2059	Away	?6	Female	2	Away
904	1	Idete	7	2030-2059	Indoor	?6	Female	1	Cooking
904	1	Idete	7	2030-2059	Outdoors	?5	Male	2	Stories no net
904	1	Idete	7	2030-2059	Indoor	?6	Female	1	Reading/studying
904	1	Idete	7	2100-2129	Away	?6	Male	1	Away
904	1	Idete	7	2100-2129	Away	?6	Female	2	Away
904	1	Idete	7	2100-2129	Indoor	?6	Female	1	Cooking
904	1	Idete	7	2100-2129	Outdoors	?6	Male	2	Stories no net
904	1	Idete	7	2100-2129	Indoor	?6	Female	1	Reading/studying
904	1	Idete	7	2130-2159	Indoor	?6	Female	1	Cooking
904	1	Idete	7	2130-2159	Outdoors	?6	Male	3	Stories no net
904	1	Idete	7	2130-2159	Outdoors	?6	Female	2	Stories no net
904	1	Idete	7	2130-2159	Indoor	?6	Female	1	Sleeping in net
904	1	Idete	7	2200-2229	Indoor	?6	Male	3	Eating
904	1	Idete	7	2200-2229	Indoor	?6	Female	4	Eating
904	1	Idete	7	2230-2259	Outdoors	?6	Male	3	Stories no net
904	1	Idete	7	2230-2259	Outdoors	?6	Female	4	Stories no net
904	1	Idete	7	2300-2329	Indoor	?6	Male	2	Sleeping in net
904	1	Idete	7	2300-2329	Indoor	?6	Female	4	Sleeping in net
904	1	Idete	7	2300-2329	Indoor	?6	Male	1	Reading/studying
904	1	Idete	7	2330-2359	Indoor	?6	Male	3	Sleeping in net
904	1	Idete	7	2330-2359	Indoor	?6	Female	4	Sleeping in net
904	1	Idete	7	0000-0029	Indoor	?6	Male	3	Sleeping in net
904	1	Idete	7	0000-0029	Indoor	?6	Female	4	Sleeping in net
904	1	Idete	7	0030-0059	Indoor	?6	Male	3	Sleeping in net
904	1	Idete	7	0030-0059	Indoor	?6	Female	4	Sleeping in net
904	1	Idete	7	0100-0129	Indoor	?6	Male	3	Sleeping in net
904	1	Idete	7	0100-0129	Indoor	?6	Female	4	Sleeping in net
904	1	Idete	7	0130-0159	Indoor	?6	Male	3	Sleeping in net
904	1	Idete	7	0130-0159	Indoor	?6	Female	4	Sleeping in net
904	1	Idete	7	0200-0229	Indoor	?6	Male	3	Sleeping in net
904	1	Idete	7	0200-0229	Indoor	?6	Female	4	Sleeping in net
904	1	Idete	7	0230-0259	Indoor	?6	Male	3	Sleeping in net
904	1	Idete	7	0230-0259	Indoor	?6	Female	4	Sleeping in net
904	1	Idete	7	0300-0329	Indoor	?6	Male	3	Sleeping in net
904	1	Idete	7	0300-0329	Indoor	?6	Female	4	Sleeping in net
904	1	Idete	7	0330-0359	Indoor	?6	Male	3	Sleeping in net
904	1	Idete	7	0330-0359	Indoor	?6	Female	4	Sleeping in net
904	1	Idete	7	0400-0429	Indoor	?6	Male	3	Sleeping in net
904	1	Idete	7	0400-0429	Indoor	?6	Female	4	Sleeping in net
904	1	Idete	7	0430-0459	Indoor	?6	Male	3	Sleeping in net
904	1	Idete	7	0430-0459	Indoor	?6	Female	4	Sleeping in net
904	1	Idete	7	0500-0529	Indoor	?6	Male	3	Sleeping in net
904	1	Idete	7	0500-0529	Indoor	?6	Female	4	Sleeping in net
904	1	Idete	7	0530-0559	Outdoors	?6	Male	1	Bathing
904	1	Idete	7	0530-0559	Outdoors	?6	Female	2	Bathing
904	1	Idete	7	0530-0559	Indoor	?6	Male	1	Sleeping in net
904	1	Idete	7	0530-0559	Indoor	?6	Female	2	Sleeping in net
904	1	Idete	7	0530-0559	Outdoors	?6	Male	1	Resting
904	1	Idete	7	0600-0629	Away	?6	Male	1	Away
904	1	Idete	7	0600-0629	Away	?6	Female	3	Away
904	1	Idete	7	0600-0629	Outdoors	?6	Male	1	Resting
904	1	Idete	7	0600-0629	Outdoors	?6	Male	1	Sweeping
904	1	Idete	7	0600-0629	Outdoors	?6	Female	1	Sweeping
904	1	Idete	7	0630-0659	Away	?6	Male	2	Away
904	1	Idete	7	0630-0659	Away	?6	Female	4	Away
904	1	Idete	7	0630-0659	Outdoors	?6	Male	1	Resting
905	1	Idete	4	1800-1829	Away	?6	Male	1	Away
905	1	Idete	4	1800-1829	Outdoors	?6	Female	1	Cooking
905	1	Idete	4	1800-1829	Outdoors	?6	Male	2	Stories no net
905	1	Idete	4	1830-1859	Away	?6	Male	2	Away
905	1	Idete	4	1830-1859	Outdoors	?6	Female	1	Cooking
905	1	Idete	4	1830-1859	Indoor	?6	Male	1	Stories in net
905	1	Idete	4	1900-1929	Away	?6	Male	1	Away
905	1	Idete	4	1900-1929	Outdoors	?6	Female	1	Cooking
905	1	Idete	4	1900-1929	Outdoors	?6	Male	2	Stories no net
905	1	Idete	4	1930-1959	Away	?6	Male	1	Away
905	1	Idete	4	1930-1959	Outdoors	?6	Female	1	Cooking
905	1	Idete	4	1930-1959	Outdoors	?6	Male	2	Stories no net
905	1	Idete	4	2000-2029	Away	?6	Female	1	Away
905	1	Idete	4	2000-2029	Outdoors	?6	Male	3	Stories no net
905	1	Idete	4	2030-2059	Away	?6	Male	1	Away
905	1	Idete	4	2030-2059	Outdoors	?5	Male	3	Stories in net
905	1	Idete	4	2100-2129	Away	?6	Male	1	Away
905	1	Idete	4	2100-2129	Outdoors	?6	Male	2	Resting
905	1	Idete	4	2100-2129	Outdoors	?6	Female	1	Resting
905	1	Idete	4	2130-2159	Outdoors	?6	Male	3	Eating
905	1	Idete	4	2130-2159	Outdoors	?6	Female	1	Eating
905	1	Idete	4	2200-2229	Outdoors	?6	Male	2	Eating
905	1	Idete	4	2200-2229	Outdoors	?6	Female	1	Eating
905	1	Idete	4	2200-2229	Indoor	?6	Male	1	Reading/studying
905	1	Idete	4	2230-2259	Indoor	?6	Male	2	Sleeping in net
905	1	Idete	4	2230-2259	Indoor	?6	Female	1	Sleeping in net
905	1	Idete	4	2230-2259	Indoor	?6	Male	1	Resting
905	1	Idete	4	2300-2329	Indoor	?6	Male	3	Sleeping in net
905	1	Idete	4	2300-2329	Indoor	?6	Female	1	Sleeping in net
905	1	Idete	4	2330-2359	Indoor	?6	Male	3	Sleeping in net
905	1	Idete	4	2330-2359	Indoor	?6	Female	1	Sleeping in net
905	1	Idete	4	0000-0029	Indoor	?6	Male	3	Sleeping in net
905	1	Idete	4	0000-0029	Indoor	?6	Female	1	Sleeping in net
905	1	Idete	4	0030-0059	Indoor	?6	Male	3	Sleeping in net
905	1	Idete	4	0030-0059	Indoor	?6	Female	1	Sleeping in net
905	1	Idete	4	0100-0129	Indoor	?6	Male	3	Sleeping in net
905	1	Idete	4	0100-0129	Indoor	?6	Female	1	Sleeping in net
905	1	Idete	4	0130-0159	Indoor	?6	Male	3	Sleeping in net
905	1	Idete	4	0130-0159	Indoor	?6	Female	1	Sleeping in net
905	1	Idete	4	0200-0229	Indoor	?6	Male	3	Sleeping in net
905	1	Idete	4	0200-0229	Indoor	?6	Female	1	Sleeping in net
905	1	Idete	4	0230-0259	Indoor	?6	Male	3	Sleeping in net
905	1	Idete	4	0230-0259	Indoor	?6	Female	1	Sleeping in net
905	1	Idete	4	0300-0329	Indoor	?6	Male	3	Sleeping in net
905	1	Idete	4	0300-0329	Indoor	?6	Female	1	Sleeping in net
905	1	Idete	4	0330-0359	Indoor	?6	Male	3	Sleeping in net
905	1	Idete	4	0330-0359	Indoor	?6	Female	1	Sleeping in net
905	1	Idete	4	0400-0429	Indoor	?6	Male	3	Sleeping in net
905	1	Idete	4	0400-0429	Indoor	?6	Female	1	Sleeping in net
905	1	Idete	4	0430-0459	Indoor	?6	Male	3	Sleeping in net
905	1	Idete	4	0430-0459	Indoor	?6	Female	1	Sleeping in net
905	1	Idete	4	0500-0529	Indoor	?6	Male	3	Sleeping in net
905	1	Idete	4	0500-0529	Indoor	?6	Female	1	Sleeping in net
905	1	Idete	4	0530-0559	Outdoors	?6	Female	1	Cooking
905	1	Idete	4	0530-0559	Indoor	?6	Male	1	Stories no net
905	1	Idete	4	0530-0559	Indoor	?6	Male	2	Sleeping in net
905	1	Idete	4	0600-0629	Outdoors	?6	Female	1	Cooking
905	1	Idete	4	0600-0629	Indoor	?6	Male	1	Sleeping in net
905	1	Idete	4	0600-0629	Indoor	?6	Male	1	Reading/studying
905	1	Idete	4	0600-0629	Outdoors	?6	Male	1	Sweeping
905	1	Idete	4	0630-0659	Away	?6	Male	1	Away
905	1	Idete	4	0630-0659	Away	?6	Female	1	Away
905	1	Idete	4	0630-0659	Indoor	?6	Male	1	Bathing
905	1	Idete	4	0630-0659	Indoor	?6	Male	1	Sleeping in net
906	1	Idete	8	1800-1829	Away	?6	Male	1	Away
906	1	Idete	8	1800-1829	Away	?6	Female	3	Away
906	1	Idete	8	1800-1829	Outdoors	?5	Male	2	Playing
906	1	Idete	8	1800-1829	Indoor	?6	Female	1	Cooking
906	1	Idete	8	1830-1859	Outdoors	?6	Male	1	Reading/studying
906	1	Idete	8	1900-1929	Away	?6	Male	1	Away
906	1	Idete	8	1900-1929	Away	?6	Female	3	Away
906	1	Idete	8	1900-1929	Outdoors	?5	Male	2	Playing
906	1	Idete	8	1900-1929	Outdoors	?6	Female	1	Cooking
906	1	Idete	8	1900-1929	Outdoors	?6	Male	1	Resting
906	1	Idete	8	1930-1959	Outdoors	?6	Male	1	Playing
906	1	Idete	8	1930-1959	Outdoors	?5	Male	2	Playing
906	1	Idete	8	1930-1959	Outdoors	?6	Female	1	Cooking
906	1	Idete	8	1930-1959	Outdoors	?6	Female	3	Washing dishes
906	1	Idete	8	1930-1959	Outdoors	?6	Female	2	Resting
906	1	Idete	8	1930-1959	Outdoors	?5	Male	2	Resting
906	1	Idete	8	2000-2029	Away	?6	Female	1	Away
906	1	Idete	8	2000-2029	Indoor	?6	Male	1	Eating
906	1	Idete	8	2000-2029	Indoor	?6	Female	3	Eating
906	1	Idete	8	2000-2029	Indoor	?5	Male	2	Eating
906	1	Idete	8	2000-2029	Outdoors	?6	Male	1	Reading/studying
906	1	Idete	8	2030-2059	Away	?6	Female	1	Away
906	1	Idete	8	2030-2059	Outdoors	?6	Male	1	Stories no net
906	1	Idete	8	2030-2059	Outdoors	?6	Female	3	Stories no net
906	1	Idete	8	2030-2059	Outdoors	?5	Male	2	Stories no net
906	1	Idete	8	2030-2059	Outdoors	?6	Male	1	Reading/studying
906	1	Idete	8	2100-2129	Away	?6	Male	1	Away
906	1	Idete	8	2100-2129	Away	?6	Female	2	Away
906	1	Idete	8	2100-2129	Outdoors	?5	Male	2	Playing
906	1	Idete	8	2100-2129	Outdoors	?6	Female	2	Bathing
906	1	Idete	8	2100-2129	Outdoors	?6	Male	1	Reading/studying
906	1	Idete	8	2130-2159	Away	?6	Female	1	Away
906	1	Idete	8	2130-2159	Outdoors	?5	Male	2	Playing
906	1	Idete	8	2130-2159	Outdoors	?6	Male	1	Washing dishes
906	1	Idete	8	2130-2159	Outdoors	?6	Female	3	Washing dishes
906	1	Idete	8	2130-2159	Outdoors	?6	Male	1	Reading/studying
906	1	Idete	8	2200-2229	Indoor	?6	Male	1	Sleeping in net
906	1	Idete	8	2200-2229	Indoor	?6	Female	4	Sleeping in net
906	1	Idete	8	2200-2229	Indoor	?5	Male	2	Sleeping in net
906	1	Idete	8	2200-2229	Indoor	?6	Male	1	Reading/studying
906	1	Idete	8	2230-2259	Indoor	?6	Male	2	Sleeping in net
906	1	Idete	8	2230-2259	Indoor	?6	Female	4	Sleeping in net
906	1	Idete	8	2230-2259	Indoor	?5	Male	2	Sleeping in net
906	1	Idete	8	2300-2329	Indoor	?6	Male	2	Sleeping in net
906	1	Idete	8	2300-2329	Indoor	?6	Female	4	Sleeping in net
906	1	Idete	8	2300-2329	Indoor	?5	Male	2	Sleeping in net
906	1	Idete	8	2330-2359	Indoor	?6	Male	2	Sleeping in net
906	1	Idete	8	2330-2359	Indoor	?6	Female	4	Sleeping in net
906	1	Idete	8	2330-2359	Indoor	?5	Male	2	Sleeping in net
906	1	Idete	8	0000-0029	Indoor	?6	Male	2	Sleeping in net
906	1	Idete	8	0000-0029	Indoor	?6	Female	4	Sleeping in net
906	1	Idete	8	0000-0029	Indoor	?5	Male	2	Sleeping in net
906	1	Idete	8	0030-0059	Indoor	?6	Male	2	Sleeping in net
906	1	Idete	8	0030-0059	Indoor	?6	Female	4	Sleeping in net
906	1	Idete	8	0030-0059	Indoor	?5	Male	2	Sleeping in net
906	1	Idete	8	0100-0129	Indoor	?6	Male	2	Sleeping in net
906	1	Idete	8	0100-0129	Indoor	?6	Female	4	Sleeping in net
906	1	Idete	8	0100-0129	Indoor	?5	Male	2	Sleeping in net
906	1	Idete	8	0130-0159	Indoor	?6	Male	2	Sleeping in net
906	1	Idete	8	0130-0159	Indoor	?6	Female	4	Sleeping in net
906	1	Idete	8	0130-0159	Indoor	?5	Male	2	Sleeping in net
906	1	Idete	8	0200-0229	Indoor	?6	Male	2	Sleeping in net
906	1	Idete	8	0200-0229	Indoor	?6	Female	4	Sleeping in net
906	1	Idete	8	0200-0229	Indoor	?5	Male	2	Sleeping in net
906	1	Idete	8	0230-0259	Indoor	?6	Male	2	Sleeping in net
906	1	Idete	8	0230-0259	Indoor	?6	Female	4	Sleeping in net
906	1	Idete	8	0230-0259	Indoor	?5	Male	2	Sleeping in net
906	1	Idete	8	0300-0329	Indoor	?6	Male	2	Sleeping in net
906	1	Idete	8	0300-0329	Indoor	?6	Female	4	Sleeping in net
906	1	Idete	8	0300-0329	Indoor	?5	Male	2	Sleeping in net
906	1	Idete	8	0330-0359	Indoor	?6	Male	2	Sleeping in net
906	1	Idete	8	0330-0359	Indoor	?6	Female	4	Sleeping in net
906	1	Idete	8	0330-0359	Indoor	?5	Male	2	Sleeping in net
906	1	Idete	8	0400-0429	Indoor	?6	Male	2	Sleeping in net
906	1	Idete	8	0400-0429	Indoor	?6	Female	4	Sleeping in net
906	1	Idete	8	0400-0429	Indoor	?5	Male	2	Sleeping in net
906	1	Idete	8	0430-0459	Indoor	?6	Male	2	Sleeping in net
906	1	Idete	8	0430-0459	Indoor	?6	Female	4	Sleeping in net
906	1	Idete	8	0430-0459	Indoor	?5	Male	2	Sleeping in net
906	1	Idete	8	0500-0529	Indoor	?6	Male	2	Sleeping in net
906	1	Idete	8	0500-0529	Indoor	?6	Female	4	Sleeping in net
906	1	Idete	8	0500-0529	Indoor	?5	Male	2	Sleeping in net
906	1	Idete	8	0530-0559	Indoor	?6	Male	2	Sleeping in net
906	1	Idete	8	0530-0559	Indoor	?6	Female	4	Sleeping in net
906	1	Idete	8	0530-0559	Indoor	?5	Male	2	Sleeping in net
906	1	Idete	8	0600-0629	Away	?6	Female	1	Away
906	1	Idete	8	0600-0629	Outdoors	?6	Male	1	Washing dishes
906	1	Idete	8	0600-0629	Outdoors	?6	Female	3	Washing dishes
906	1	Idete	8	0600-0629	Indoor	?5	Male	2	Sleeping in net
906	1	Idete	8	0600-0629	Outdoors	?6	Male	1	Reading/studying
906	1	Idete	8	0630-0659	Away	?6	Female	1	Away
906	1	Idete	8	0630-0659	Outdoors	?5	Male	2	Playing
906	1	Idete	8	0630-0659	Outdoors	?6	Female	2	Eating
906	1	Idete	8	0630-0659	Indoor	?6	Male	1	Bathing
906	1	Idete	8	0630-0659	Outdoors	?6	Female	1	Resting
906	1	Idete	8	0630-0659	Outdoors	?6	Male	1	Reading/studying
907	1	Idete	4	1800-1829	Away	?6	Male	1	Away
907	1	Idete	4	1800-1829	Outdoors	?6	Female	1	Playing
907	1	Idete	4	1800-1829	Outdoors	?5	Male	1	Playing
907	1	Idete	4	1800-1829	Indoor	?6	Female	1	Bathing
907	1	Idete	4	1830-1859	Away	?6	Male	1	Away
907	1	Idete	4	1830-1859	Outdoors	?5	Male	1	Playing
907	1	Idete	4	1830-1859	Outdoors	?6	Female	1	Cooking
907	1	Idete	4	1830-1859	Outdoors	?6	Female	1	Resting
907	1	Idete	4	1900-1929	Away	?6	Male	1	Away
907	1	Idete	4	1900-1929	Outdoors	?6	Female	1	Playing
907	1	Idete	4	1900-1929	Outdoors	?5	Male	1	Playing
907	1	Idete	4	1900-1929	Outdoors	?6	Female	1	Resting
907	1	Idete	4	1930-1959	Outdoors	?6	Female	1	Cooking
907	1	Idete	4	1930-1959	Outdoors	?5	Male	1	Watching TV
907	1	Idete	4	1930-1959	Outdoors	?6	Male	1	Bathing
907	1	Idete	4	2000-2029	Outdoors	?6	Male	1	Eating
907	1	Idete	4	2000-2029	Outdoors	?6	Female	2	Eating
907	1	Idete	4	2000-2029	Outdoors	?5	Male	1	Eating
907	1	Idete	4	2030-2059	Outdoors	?5	Male	1	Watching TV
907	1	Idete	4	2030-2059	Outdoors	?6	Male	1	Resting
907	1	Idete	4	2030-2059	Outdoors	?6	Female	2	Resting
907	1	Idete	4	2100-2129	Outdoors	?6	Female	1	walking/passing
907	1	Idete	4	2100-2129	Outdoors	?5	Male	1	walking/passing
907	1	Idete	4	2100-2129	Outdoors	?6	Male	1	Resting
907	1	Idete	4	2100-2129	Outdoors	?6	Female	1	Resting
907	1	Idete	4	2130-2159	Indoor	?6	Female	2	Sleeping in net
907	1	Idete	4	2130-2159	Indoor	?5	Male	1	Sleeping in net
907	1	Idete	4	2130-2159	Outdoors	?6	Male	1	Resting
907	1	Idete	4	2200-2229	Indoor	?6	Male	1	Sleeping in net
907	1	Idete	4	2200-2229	Indoor	?6	Female	2	Sleeping in net
907	1	Idete	4	2200-2229	Indoor	?5	Male	1	Sleeping in net
907	1	Idete	4	2230-2259	Indoor	?6	Male	1	Sleeping in net
907	1	Idete	4	2230-2259	Indoor	?6	Female	2	Sleeping in net
907	1	Idete	4	2230-2259	Indoor	?5	Male	1	Sleeping in net
907	1	Idete	4	2300-2329	Indoor	?6	Male	1	Sleeping in net
907	1	Idete	4	2300-2329	Indoor	?6	Female	2	Sleeping in net
907	1	Idete	4	2300-2329	Indoor	?5	Male	1	Sleeping in net
907	1	Idete	4	2330-2359	Indoor	?6	Male	1	Sleeping in net
907	1	Idete	4	2330-2359	Indoor	?6	Female	2	Sleeping in net
907	1	Idete	4	2330-2359	Indoor	?5	Male	1	Sleeping in net
907	1	Idete	4	0000-0029	Indoor	?6	Male	1	Sleeping in net
907	1	Idete	4	0000-0029	Indoor	?6	Female	2	Sleeping in net
907	1	Idete	4	0000-0029	Indoor	?5	Male	1	Sleeping in net
907	1	Idete	4	0030-0059	Indoor	?6	Male	1	Sleeping in net
907	1	Idete	4	0030-0059	Indoor	?6	Female	2	Sleeping in net
907	1	Idete	4	0030-0059	Indoor	?5	Male	1	Sleeping in net
907	1	Idete	4	0100-0129	Indoor	?6	Male	1	Sleeping in net
907	1	Idete	4	0100-0129	Indoor	?6	Female	2	Sleeping in net
907	1	Idete	4	0100-0129	Indoor	?5	Male	1	Sleeping in net
907	1	Idete	4	0130-0159	Indoor	?6	Male	1	Sleeping in net
907	1	Idete	4	0130-0159	Indoor	?6	Female	2	Sleeping in net
907	1	Idete	4	0130-0159	Indoor	?5	Male	1	Sleeping in net
907	1	Idete	4	0200-0229	Indoor	?6	Male	1	Sleeping in net
907	1	Idete	4	0200-0229	Indoor	?6	Female	2	Sleeping in net
907	1	Idete	4	0200-0229	Indoor	?5	Male	1	Sleeping in net
907	1	Idete	4	0230-0259	Indoor	?6	Male	1	Sleeping in net
907	1	Idete	4	0230-0259	Indoor	?6	Female	2	Sleeping in net
907	1	Idete	4	0230-0259	Indoor	?5	Male	1	Sleeping in net
907	1	Idete	4	0300-0329	Indoor	?6	Male	1	Sleeping in net
907	1	Idete	4	0300-0329	Indoor	?6	Female	2	Sleeping in net
907	1	Idete	4	0300-0329	Indoor	?5	Male	1	Sleeping in net
907	1	Idete	4	0330-0359	Indoor	?6	Male	1	Sleeping in net
907	1	Idete	4	0330-0359	Indoor	?6	Female	2	Sleeping in net
907	1	Idete	4	0330-0359	Indoor	?5	Male	2	Sleeping in net
907	1	Idete	4	0400-0429	Indoor	?6	Male	1	Sleeping in net
907	1	Idete	4	0400-0429	Indoor	?6	Female	2	Sleeping in net
907	1	Idete	4	0400-0429	Indoor	?5	Male	2	Sleeping in net
907	1	Idete	4	0430-0459	Indoor	?6	Male	1	Sleeping in net
907	1	Idete	4	0430-0459	Indoor	?6	Female	2	Sleeping in net
907	1	Idete	4	0430-0459	Indoor	?5	Male	2	Sleeping in net
907	1	Idete	4	0500-0529	Indoor	?6	Male	1	Sleeping in net
907	1	Idete	4	0500-0529	Indoor	?6	Female	2	Sleeping in net
907	1	Idete	4	0500-0529	Indoor	?5	Male	1	Sleeping in net
907	1	Idete	4	0530-0559	Indoor	?6	Female	2	Sleeping in net
907	1	Idete	4	0530-0559	Indoor	?5	Male	1	Sleeping in net
907	1	Idete	4	0530-0559	Outdoors	?6	Male	1	Brushing teeth
907	1	Idete	4	0600-0629	Indoor	?6	Female	1	Sleeping in net
907	1	Idete	4	0600-0629	Indoor	?5	Male	1	Sleeping in net
907	1	Idete	4	0600-0629	Outdoors	?6	Male	1	Resting
907	1	Idete	4	0600-0629	Outdoors	?6	Female	1	Sweeping
907	1	Idete	4	0630-0659	Away	?6	Female	1	Away
907	1	Idete	4	0630-0659	Outdoors	?6	Female	1	walking/passing
907	1	Idete	4	0630-0659	Indoor	?5	Male	1	Sleeping in net
907	1	Idete	4	0630-0659	Outdoors	?6	Male	1	Resting
908	1	Idete	4	1800-1829	Away	?5	Male	1	Away
908	1	Idete	4	1800-1829	Outdoors	?5	Female	1	Playing
908	1	Idete	4	1800-1829	Outdoors	?6	Male	1	walking/passing
908	1	Idete	4	1800-1829	Outdoors	?6	Female	1	walking/passing
908	1	Idete	4	1830-1859	Indoor	?6	Female	1	Cooking
908	1	Idete	4	1830-1859	Outdoors	?5	Male	1	Bathing
908	1	Idete	4	1830-1859	Outdoors	?5	Female	1	Bathing
908	1	Idete	4	1830-1859	Indoor	?6	Female	1	Weaving mats
908	1	Idete	4	1900-1929	Outdoors	?5	Male	1	Stories no net
908	1	Idete	4	1900-1929	Outdoors	?5	Female	1	Stories no net
908	1	Idete	4	1900-1929	Outdoors	?6	Female	1	Washing dishes
908	1	Idete	4	1900-1929	Outdoors	?6	Male	1	Cutting firewood
908	1	Idete	4	1930-1959	Indoor	?6	Female	1	Cooking
908	1	Idete	4	1930-1959	Indoor	?6	Male	1	Reading/studying
908	1	Idete	4	1930-1959	Indoor	?5	Male	1	Singing
908	1	Idete	4	1930-1959	Indoor	?5	Female	1	Singing
908	1	Idete	4	2000-2029	Away	?5	Male	1	Away
908	1	Idete	4	2000-2029	Indoor	?6	Male	1	Eating
908	1	Idete	4	2000-2029	Indoor	?6	Female	1	Eating
908	1	Idete	4	2000-2029	Indoor	?5	Female	1	Eating
908	1	Idete	4	2030-2059	Outdoors	?6	Male	1	Stories no net
908	1	Idete	4	2030-2059	Outdoors	?6	Female	1	Stories no net
908	1	Idete	4	2030-2059	Indoor	?5	Male	1	Resting
908	1	Idete	4	2030-2059	Indoor	?5	Female	1	Resting
908	1	Idete	4	2100-2129	Indoor	?5	Male	1	Playing
908	1	Idete	4	2100-2129	Indoor	?5	Female	1	Playing
908	1	Idete	4	2100-2129	Indoor	?6	Male	1	Bathing
908	1	Idete	4	2100-2129	Indoor	?6	Female	1	Bathing
908	1	Idete	4	2130-2159	Away	?6	Female	1	Away
908	1	Idete	4	2130-2159	Indoor	?5	Male	1	Sleeping in net
908	1	Idete	4	2130-2159	Indoor	?5	Female	1	Sleeping in net
908	1	Idete	4	2130-2159	Indoor	?6	Male	1	Putting a child to sleep
908	1	Idete	4	2200-2229	Indoor	?6	Male	1	Stories in net
908	1	Idete	4	2200-2229	Indoor	?6	Female	1	Stories in net
908	1	Idete	4	2200-2229	Indoor	?5	Male	1	Sleeping in net
908	1	Idete	4	2200-2229	Indoor	?5	Female	1	Sleeping in net
908	1	Idete	4	2230-2259	Indoor	?6	Female	1	Sleeping in net
908	1	Idete	4	2230-2259	Indoor	?5	Male	1	Sleeping in net
908	1	Idete	4	2230-2259	Indoor	?5	Female	1	Sleeping in net
908	1	Idete	4	2230-2259	Indoor	?6	Male	1	Resting
908	1	Idete	4	2300-2329	Indoor	?6	Male	1	Sleeping in net
908	1	Idete	4	2300-2329	Indoor	?6	Female	1	Sleeping in net
908	1	Idete	4	2300-2329	Indoor	?5	Male	1	Sleeping in net
908	1	Idete	4	2300-2329	Indoor	?5	Female	1	Sleeping in net
908	1	Idete	4	2330-2359	Indoor	?6	Male	1	Sleeping in net
908	1	Idete	4	2330-2359	Indoor	?6	Female	1	Sleeping in net
908	1	Idete	4	2330-2359	Indoor	?5	Male	1	Sleeping in net
908	1	Idete	4	2330-2359	Indoor	?5	Female	1	Sleeping in net
908	1	Idete	4	0000-0029	Indoor	?6	Male	1	Sleeping in net
908	1	Idete	4	0000-0029	Indoor	?6	Female	1	Sleeping in net
908	1	Idete	4	0000-0029	Indoor	?5	Male	1	Sleeping in net
908	1	Idete	4	0000-0029	Indoor	?5	Female	1	Sleeping in net
908	1	Idete	4	0030-0059	Indoor	?6	Male	1	Sleeping in net
908	1	Idete	4	0030-0059	Indoor	?6	Female	1	Sleeping in net
908	1	Idete	4	0030-0059	Indoor	?5	Male	1	Sleeping in net
908	1	Idete	4	0030-0059	Indoor	?5	Female	1	Sleeping in net
908	1	Idete	4	0100-0129	Indoor	?6	Male	1	Sleeping in net
908	1	Idete	4	0100-0129	Indoor	?6	Female	1	Sleeping in net
908	1	Idete	4	0100-0129	Indoor	?5	Male	1	Sleeping in net
908	1	Idete	4	0100-0129	Indoor	?5	Female	1	Sleeping in net
908	1	Idete	4	0130-0159	Indoor	?6	Male	1	Sleeping in net
908	1	Idete	4	0130-0159	Indoor	?6	Female	1	Sleeping in net
908	1	Idete	4	0130-0159	Indoor	?5	Male	1	Sleeping in net
908	1	Idete	4	0130-0159	Indoor	?5	Female	1	Sleeping in net
908	1	Idete	4	0200-0229	Indoor	?6	Male	1	Sleeping in net
908	1	Idete	4	0200-0229	Indoor	?6	Female	1	Sleeping in net
908	1	Idete	4	0200-0229	Indoor	?5	Male	1	Sleeping in net
908	1	Idete	4	0200-0229	Indoor	?5	Female	1	Sleeping in net
908	1	Idete	4	0230-0259	Indoor	?6	Male	1	Sleeping in net
908	1	Idete	4	0230-0259	Indoor	?6	Female	1	Sleeping in net
908	1	Idete	4	0230-0259	Indoor	?5	Male	1	Sleeping in net
908	1	Idete	4	0230-0259	Indoor	?5	Female	1	Sleeping in net
908	1	Idete	4	0300-0329	Indoor	?6	Male	1	Sleeping in net
908	1	Idete	4	0300-0329	Indoor	?6	Female	1	Sleeping in net
908	1	Idete	4	0300-0329	Indoor	?5	Male	1	Sleeping in net
908	1	Idete	4	0300-0329	Indoor	?5	Female	1	Sleeping in net
908	1	Idete	4	0330-0359	Indoor	?6	Male	1	Sleeping in net
908	1	Idete	4	0330-0359	Indoor	?6	Female	1	Sleeping in net
908	1	Idete	4	0330-0359	Indoor	?5	Male	1	Sleeping in net
908	1	Idete	4	0330-0359	Indoor	?5	Female	1	Sleeping in net
908	1	Idete	4	0400-0429	Indoor	?6	Male	1	Sleeping in net
908	1	Idete	4	0400-0429	Indoor	?6	Female	1	Sleeping in net
908	1	Idete	4	0400-0429	Indoor	?5	Male	1	Sleeping in net
908	1	Idete	4	0400-0429	Indoor	?5	Female	1	Sleeping in net
908	1	Idete	4	0430-0459	Indoor	?6	Male	1	Sleeping in net
908	1	Idete	4	0430-0459	Indoor	?6	Female	1	Sleeping in net
908	1	Idete	4	0430-0459	Indoor	?5	Male	1	Sleeping in net
908	1	Idete	4	0430-0459	Indoor	?5	Female	1	Sleeping in net
908	1	Idete	4	0500-0529	Indoor	?6	Male	1	Sleeping in net
908	1	Idete	4	0500-0529	Indoor	?6	Female	1	Sleeping in net
908	1	Idete	4	0500-0529	Indoor	?5	Male	1	Sleeping in net
908	1	Idete	4	0500-0529	Indoor	?5	Female	1	Sleeping in net
908	1	Idete	4	0530-0559	Indoor	?6	Male	1	Sleeping in net
908	1	Idete	4	0530-0559	Indoor	?6	Female	1	Sleeping in net
908	1	Idete	4	0530-0559	Indoor	?5	Male	1	Sleeping in net
908	1	Idete	4	0530-0559	Indoor	?5	Female	1	Sleeping in net
908	1	Idete	4	0600-0629	Indoor	?5	Male	1	Sleeping in net
908	1	Idete	4	0600-0629	Indoor	?5	Female	1	Sleeping in net
908	1	Idete	4	0600-0629	Indoor	?6	Male	1	Reading/studying
908	1	Idete	4	0600-0629	Outdoors	?6	Female	1	Sweeping
908	1	Idete	4	0630-0659	Outdoors	?5	Male	1	walking/passing
908	1	Idete	4	0630-0659	Outdoors	?5	Female	1	walking/passing
908	1	Idete	4	0630-0659	Outdoors	?6	Male	1	Fetching water
908	1	Idete	4	0630-0659	Outdoors	?6	Female	1	Fetching water
909	1	Idete	7	1800-1829	Away	?5	Male	1	Away
909	1	Idete	7	1800-1829	Indoor	?6	Female	1	Cooking
909	1	Idete	7	1800-1829	Indoor	?6	Male	1	Stories no net
909	1	Idete	7	1800-1829	Indoor	?6	Female	3	Stories no net
909	1	Idete	7	1800-1829	Outdoors	?6	Female	1	Washing dishes
909	1	Idete	7	1830-1859	Away	?5	Male	1	Away
909	1	Idete	7	1830-1859	Indoor	?6	Female	1	Cooking
909	1	Idete	7	1830-1859	Indoor	?6	Male	1	Stories no net
909	1	Idete	7	1830-1859	Indoor	?6	Female	4	Stories no net
909	1	Idete	7	1900-1929	Away	?6	Female	2	Away
909	1	Idete	7	1900-1929	Outdoors	?5	Male	1	Eating
909	1	Idete	7	1900-1929	Indoor	?6	Male	1	Stories no net
909	1	Idete	7	1900-1929	Indoor	?6	Female	3	Stories no net
909	1	Idete	7	1930-1959	Away	?6	Female	2	Away
909	1	Idete	7	1930-1959	Outdoors	?5	Male	1	Playing
909	1	Idete	7	1930-1959	Outdoors	?6	Male	1	Stories no net
909	1	Idete	7	1930-1959	Outdoors	?6	Female	3	Stories no net
909	1	Idete	7	2000-2029	Away	?6	Female	2	Away
909	1	Idete	7	2000-2029	Outdoors	?5	Male	1	Playing
909	1	Idete	7	2000-2029	Outdoors	?6	Male	1	Eating
909	1	Idete	7	2000-2029	Outdoors	?6	Female	3	Eating
909	1	Idete	7	2030-2059	Outdoors	?6	Male	1	Stories no net
909	1	Idete	7	2030-2059	Outdoors	?6	Female	5	Stories no net
909	1	Idete	7	2030-2059	Indoor	?5	Male	1	Sleeping in net
909	1	Idete	7	2100-2129	Outdoors	?6	Male	1	Stories no net
909	1	Idete	7	2100-2129	Outdoors	?6	Female	5	Stories no net
909	1	Idete	7	2100-2129	Indoor	?5	Male	1	Sleeping in net
909	1	Idete	7	2130-2159	Outdoors	?6	Male	1	Stories no net
909	1	Idete	7	2130-2159	Outdoors	?6	Female	1	Stories no net
909	1	Idete	7	2130-2159	Outdoors	?6	Female	2	Bathing
909	1	Idete	7	2130-2159	Indoor	?6	Female	1	Sleeping in net
909	1	Idete	7	2130-2159	Indoor	?5	Male	1	Sleeping in net
909	1	Idete	7	2130-2159	Outdoors	?6	Female	1	Doing laundry
909	1	Idete	7	2200-2229	Outdoors	?6	Male	1	Stories no net
909	1	Idete	7	2200-2229	Outdoors	?6	Female	1	Bathing
909	1	Idete	7	2200-2229	Indoor	?6	Female	4	Sleeping in net
909	1	Idete	7	2200-2229	Indoor	?5	Male	1	Sleeping in net
909	1	Idete	7	2230-2259	Outdoors	?6	Male	1	Bathing
909	1	Idete	7	2230-2259	Indoor	?6	Female	4	Sleeping in net
909	1	Idete	7	2230-2259	Indoor	?5	Male	1	Sleeping in net
909	1	Idete	7	2230-2259	Indoor	?6	Female	1	Reading/studying
909	1	Idete	7	2300-2329	Indoor	?6	Female	5	Sleeping in net
909	1	Idete	7	2300-2329	Indoor	?5	Male	1	Sleeping in net
909	1	Idete	7	2300-2329	Indoor	?6	Male	1	Reading/studying
909	1	Idete	7	2330-2359	Indoor	?6	Male	1	Sleeping in net
909	1	Idete	7	2330-2359	Indoor	?6	Female	5	Sleeping in net
909	1	Idete	7	2330-2359	Indoor	?5	Male	1	Sleeping in net
909	1	Idete	7	0000-0029	Indoor	?6	Male	1	Sleeping in net
909	1	Idete	7	0000-0029	Indoor	?6	Female	5	Sleeping in net
909	1	Idete	7	0000-0029	Indoor	?5	Male	1	Sleeping in net
909	1	Idete	7	0030-0059	Indoor	?6	Male	1	Sleeping in net
909	1	Idete	7	0030-0059	Indoor	?6	Female	5	Sleeping in net
909	1	Idete	7	0030-0059	Indoor	?5	Male	1	Sleeping in net
909	1	Idete	7	0100-0129	Indoor	?6	Male	1	Sleeping in net
909	1	Idete	7	0100-0129	Indoor	?6	Female	5	Sleeping in net
909	1	Idete	7	0100-0129	Indoor	?5	Male	1	Sleeping in net
909	1	Idete	7	0130-0159	Indoor	?6	Male	1	Sleeping in net
909	1	Idete	7	0130-0159	Indoor	?6	Female	5	Sleeping in net
909	1	Idete	7	0130-0159	Indoor	?5	Male	1	Sleeping in net
909	1	Idete	7	0200-0229	Indoor	?6	Male	1	Sleeping in net
909	1	Idete	7	0200-0229	Indoor	?6	Female	5	Sleeping in net
909	1	Idete	7	0200-0229	Indoor	?5	Male	1	Sleeping in net
909	1	Idete	7	0230-0259	Indoor	?6	Male	1	Sleeping in net
909	1	Idete	7	0230-0259	Indoor	?6	Female	5	Sleeping in net
909	1	Idete	7	0230-0259	Indoor	?5	Male	1	Sleeping in net
909	1	Idete	7	0300-0329	Indoor	?6	Male	1	Sleeping in net
909	1	Idete	7	0300-0329	Indoor	?6	Female	5	Sleeping in net
909	1	Idete	7	0300-0329	Indoor	?5	Male	1	Sleeping in net
909	1	Idete	7	0330-0359	Indoor	?6	Male	1	Sleeping in net
909	1	Idete	7	0330-0359	Indoor	?6	Female	5	Sleeping in net
909	1	Idete	7	0330-0359	Indoor	?5	Male	1	Sleeping in net
909	1	Idete	7	0400-0429	Indoor	?6	Male	1	Sleeping in net
909	1	Idete	7	0400-0429	Indoor	?6	Female	5	Sleeping in net
909	1	Idete	7	0400-0429	Indoor	?5	Male	1	Sleeping in net
909	1	Idete	7	0430-0459	Indoor	?6	Male	1	Sleeping in net
909	1	Idete	7	0430-0459	Indoor	?6	Female	5	Sleeping in net
909	1	Idete	7	0430-0459	Indoor	?5	Male	1	Sleeping in net
909	1	Idete	7	0500-0529	Indoor	?6	Male	1	Sleeping in net
909	1	Idete	7	0500-0529	Indoor	?6	Female	5	Sleeping in net
909	1	Idete	7	0500-0529	Indoor	?5	Male	1	Sleeping in net
909	1	Idete	7	0530-0559	Indoor	?6	Female	3	Sleeping in net
909	1	Idete	7	0530-0559	Indoor	?5	Male	1	Sleeping in net
909	1	Idete	7	0530-0559	Outdoors	?6	Male	1	Reading/studying
909	1	Idete	7	0530-0559	Outdoors	?6	Female	1	Fetching water
909	1	Idete	7	0600-0629	Outdoors	?6	Female	1	Bathing
909	1	Idete	7	0600-0629	Indoor	?6	Female	1	Sleeping in net
909	1	Idete	7	0600-0629	Indoor	?5	Male	1	Sleeping in net
909	1	Idete	7	0600-0629	Outdoors	?6	Male	1	Reading/studying
909	1	Idete	7	0600-0629	Outdoors	?6	Female	2	Sweeping
909	1	Idete	7	0600-0629	Outdoors	?6	Female	1	Fetching water
909	1	Idete	7	0630-0659	Away	?6	Female	2	Away
909	1	Idete	7	0630-0659	Outdoors	?6	Female	2	Washing dishes
909	1	Idete	7	0630-0659	Indoor	?6	Female	1	Sleeping in net
909	1	Idete	7	0630-0659	Indoor	?5	Male	1	Sleeping in net
909	1	Idete	7	0630-0659	Outdoors	?6	Male	1	Reading/studying
910	1	Idete	5	1800-1829	Away	?6	Male	1	Away
910	1	Idete	5	1800-1829	Outdoors	?5	Female	1	Playing
910	1	Idete	5	1800-1829	Outdoors	?6	Female	1	Cooking
910	1	Idete	5	1800-1829	Outdoors	?6	Female	1	Stories in net
910	1	Idete	5	1800-1829	Indoor	?6	Male	1	Bathing
910	1	Idete	5	1830-1859	Away	?6	Male	1	Away
910	1	Idete	5	1830-1859	Outdoors	?5	Female	1	Playing
910	1	Idete	5	1830-1859	Outdoors	?6	Female	1	Washing dishes
910	1	Idete	5	1830-1859	Outdoors	?6	Female	1	Resting
910	1	Idete	5	1830-1859	Indoor	?6	Male	1	Reading/studying
910	1	Idete	5	1900-1929	Away	?6	Male	1	Away
910	1	Idete	5	1900-1929	Away	?5	Female	1	Away
910	1	Idete	5	1900-1929	Outdoors	?6	Female	1	Washing dishes
910	1	Idete	5	1900-1929	Outdoors	?6	Female	1	Resting
910	1	Idete	5	1900-1929	Outdoors	?6	Male	1	Reading/studying
910	1	Idete	5	1930-1959	Away	?6	Male	1	Away
910	1	Idete	5	1930-1959	Outdoors	?6	Female	1	Cooking
910	1	Idete	5	1930-1959	Outdoors	?6	Female	1	Eating
910	1	Idete	5	1930-1959	Outdoors	?5	Female	1	Eating
910	1	Idete	5	1930-1959	Outdoors	?6	Male	1	Reading/studying
910	1	Idete	5	2000-2029	Outdoors	?6	Male	1	Eating
910	1	Idete	5	2000-2029	Outdoors	?6	Female	1	Eating
910	1	Idete	5	2000-2029	Outdoors	?5	Female	1	Eating
910	1	Idete	5	2000-2029	Outdoors	?6	Male	1	Resting
910	1	Idete	5	2000-2029	Indoor	?6	Female	1	Preparing bed
910	1	Idete	5	2030-2059	Indoor	?6	Female	1	Bathing
910	1	Idete	5	2030-2059	Indoor	?5	Female	1	Bathing
910	1	Idete	5	2030-2059	Indoor	?6	Male	1	Sleeping in net
910	1	Idete	5	2030-2059	Indoor	?6	Female	1	Sleeping in net
910	1	Idete	5	2030-2059	Outdoors	?6	Male	1	Resting
910	1	Idete	5	2100-2129	Indoor	?6	Male	1	Sleeping in net
910	1	Idete	5	2100-2129	Indoor	?6	Female	2	Sleeping in net
910	1	Idete	5	2100-2129	Indoor	?5	Female	1	Sleeping in net
910	1	Idete	5	2100-2129	Indoor	?6	Male	1	Resting
910	1	Idete	5	2130-2159	Indoor	?6	Male	2	Sleeping in net
910	1	Idete	5	2130-2159	Indoor	?6	Female	2	Sleeping in net
910	1	Idete	5	2130-2159	Indoor	?5	Female	1	Sleeping in net
910	1	Idete	5	2200-2229	Indoor	?6	Male	2	Sleeping in net
910	1	Idete	5	2200-2229	Indoor	?6	Female	2	Sleeping in net
910	1	Idete	5	2200-2229	Indoor	?5	Female	1	Sleeping in net
910	1	Idete	5	2230-2259	Indoor	?6	Male	2	Sleeping in net
910	1	Idete	5	2230-2259	Indoor	?6	Female	2	Sleeping in net
910	1	Idete	5	2230-2259	Indoor	?5	Female	1	Sleeping in net
910	1	Idete	5	2300-2329	Indoor	?6	Male	2	Sleeping in net
910	1	Idete	5	2300-2329	Indoor	?6	Female	2	Sleeping in net
910	1	Idete	5	2300-2329	Indoor	?5	Female	1	Sleeping in net
910	1	Idete	5	2330-2359	Indoor	?6	Male	2	Sleeping in net
910	1	Idete	5	2330-2359	Indoor	?6	Female	2	Sleeping in net
910	1	Idete	5	2330-2359	Indoor	?5	Female	1	Sleeping in net
910	1	Idete	5	0000-0029	Indoor	?6	Male	2	Sleeping in net
910	1	Idete	5	0000-0029	Indoor	?6	Female	2	Sleeping in net
910	1	Idete	5	0000-0029	Indoor	?5	Female	1	Sleeping in net
910	1	Idete	5	0030-0059	Indoor	?6	Male	2	Sleeping in net
910	1	Idete	5	0030-0059	Indoor	?6	Female	2	Sleeping in net
910	1	Idete	5	0030-0059	Indoor	?5	Female	1	Sleeping in net
910	1	Idete	5	0100-0129	Indoor	?6	Male	2	Sleeping in net
910	1	Idete	5	0100-0129	Indoor	?6	Female	2	Sleeping in net
910	1	Idete	5	0100-0129	Indoor	?5	Female	1	Sleeping in net
910	1	Idete	5	0130-0159	Indoor	?6	Male	2	Sleeping in net
910	1	Idete	5	0130-0159	Indoor	?6	Female	2	Sleeping in net
910	1	Idete	5	0130-0159	Indoor	?5	Female	1	Sleeping in net
910	1	Idete	5	0200-0229	Indoor	?6	Male	2	Sleeping in net
910	1	Idete	5	0200-0229	Indoor	?6	Female	2	Sleeping in net
910	1	Idete	5	0200-0229	Indoor	?5	Female	1	Sleeping in net
910	1	Idete	5	0230-0259	Indoor	?6	Male	2	Sleeping in net
910	1	Idete	5	0230-0259	Indoor	?6	Female	2	Sleeping in net
910	1	Idete	5	0230-0259	Indoor	?5	Female	1	Sleeping in net
910	1	Idete	5	0300-0329	Indoor	?6	Male	2	Sleeping in net
910	1	Idete	5	0300-0329	Indoor	?6	Female	2	Sleeping in net
910	1	Idete	5	0300-0329	Indoor	?5	Female	1	Sleeping in net
910	1	Idete	5	0330-0359	Indoor	?6	Male	2	Sleeping in net
910	1	Idete	5	0330-0359	Indoor	?6	Female	2	Sleeping in net
910	1	Idete	5	0330-0359	Indoor	?5	Female	1	Sleeping in net
910	1	Idete	5	0400-0429	Indoor	?6	Male	2	Sleeping in net
910	1	Idete	5	0400-0429	Indoor	?6	Female	2	Sleeping in net
910	1	Idete	5	0400-0429	Indoor	?5	Female	1	Sleeping in net
910	1	Idete	5	0430-0459	Indoor	?6	Male	2	Sleeping in net
910	1	Idete	5	0430-0459	Indoor	?6	Female	2	Sleeping in net
910	1	Idete	5	0430-0459	Indoor	?5	Female	1	Sleeping in net
910	1	Idete	5	0500-0529	Indoor	?6	Male	2	Sleeping in net
910	1	Idete	5	0500-0529	Indoor	?6	Female	2	Sleeping in net
910	1	Idete	5	0500-0529	Indoor	?5	Female	1	Sleeping in net
910	1	Idete	5	0530-0559	Indoor	?6	Male	2	Sleeping in net
910	1	Idete	5	0530-0559	Indoor	?6	Female	2	Sleeping in net
910	1	Idete	5	0530-0559	Indoor	?5	Female	1	Sleeping in net
910	1	Idete	5	0600-0629	Away	?6	Male	1	Away
910	1	Idete	5	0600-0629	Indoor	?6	Female	2	Sleeping in net
910	1	Idete	5	0600-0629	Indoor	?5	Female	1	Sleeping in net
910	1	Idete	5	0600-0629	Outdoors	?6	Male	1	Resting
910	1	Idete	5	0630-0659	Away	?6	Male	1	Away
910	1	Idete	5	0630-0659	Indoor	?6	Female	1	Sleeping in net
910	1	Idete	5	0630-0659	Indoor	?5	Female	1	Sleeping in net
910	1	Idete	5	0630-0659	Outdoors	?6	Male	1	Reading/studying
910	1	Idete	5	0630-0659	Outdoors	?6	Female	1	Sweeping
901	2	Idete	3	1800-1829	Away	?6	Female	1	Away
901	2	Idete	3	1800-1829	Away	?5	Male	1	Away
901	2	Idete	3	1800-1829	Indoor	?6	Male	1	Bathing
901	2	Idete	3	1830-1859	Outdoors	?5	Female	1	Bathing
901	2	Idete	3	1830-1859	Outdoors	?6	Male	1	Reading/studying
901	2	Idete	3	1830-1859	Outdoors	?6	Female	1	Bathing child
901	2	Idete	3	1900-1929	Outdoors	?6	Female	1	Washing dishes
901	2	Idete	3	1900-1929	Outdoors	?5	Male	1	Resting
901	2	Idete	3	1900-1929	Indoor	?6	Male	1	Reading/studying
901	2	Idete	3	1930-1959	Outdoors	?5	Male	1	Playing
901	2	Idete	3	1930-1959	Outdoors	?6	Female	1	Cooking
901	2	Idete	3	1930-1959	Outdoors	?6	Male	1	Listening radio
901	2	Idete	3	2000-2029	Outdoors	?6	Female	1	Eating
901	2	Idete	3	2000-2029	Outdoors	?5	Male	1	Eating
901	2	Idete	3	2000-2029	Indoor	?5	Male	1	Sleeping in net
901	2	Idete	3	2000-2029	Outdoors	?6	Male	1	Resting
901	2	Idete	3	2030-2059	Outdoors	?6	Male	1	Eating
901	2	Idete	3	2030-2059	Indoor	?5	Male	1	Sleeping in net
901	2	Idete	3	2030-2059	Outdoors	?6	Female	1	Reading/studying
901	2	Idete	3	2100-2129	Indoor	?5	Male	1	Sleeping in net
901	2	Idete	3	2100-2129	Outdoors	?6	Male	1	Resting
901	2	Idete	3	2100-2129	Outdoors	?6	Female	1	Resting
901	2	Idete	3	2130-2159	Indoor	?6	Male	1	Stories in net
901	2	Idete	3	2130-2159	Indoor	?6	Female	1	Stories in net
901	2	Idete	3	2130-2159	Indoor	?5	Male	1	Sleeping in net
901	2	Idete	3	2200-2229	Indoor	?6	Female	1	Sleeping in net
901	2	Idete	3	2200-2229	Indoor	?5	Male	1	Sleeping in net
901	2	Idete	3	2200-2229	Indoor	?6	Male	1	Resting
901	2	Idete	3	2230-2259	Indoor	?6	Male	1	Sleeping in net
901	2	Idete	3	2230-2259	Indoor	?6	Female	1	Sleeping in net
901	2	Idete	3	2230-2259	Indoor	?5	Male	1	Sleeping in net
901	2	Idete	3	2300-2329	Indoor	?6	Male	1	Sleeping in net
901	2	Idete	3	2300-2329	Indoor	?6	Female	1	Sleeping in net
901	2	Idete	3	2300-2329	Indoor	?5	Male	1	Sleeping in net
901	2	Idete	3	2330-2359	Indoor	?6	Male	1	Sleeping in net
901	2	Idete	3	2330-2359	Indoor	?6	Female	1	Sleeping in net
901	2	Idete	3	2330-2359	Indoor	?5	Male	1	Sleeping in net
901	2	Idete	3	0000-0029	Indoor	?6	Male	1	Sleeping in net
901	2	Idete	3	0000-0029	Indoor	?6	Female	1	Sleeping in net
901	2	Idete	3	0000-0029	Indoor	?5	Male	1	Sleeping in net
901	2	Idete	3	0030-0059	Indoor	?6	Male	1	Sleeping in net
901	2	Idete	3	0030-0059	Indoor	?6	Female	1	Sleeping in net
901	2	Idete	3	0030-0059	Indoor	?5	Male	1	Sleeping in net
901	2	Idete	3	0100-0129	Indoor	?6	Male	1	Sleeping in net
901	2	Idete	3	0100-0129	Indoor	?6	Female	1	Sleeping in net
901	2	Idete	3	0100-0129	Indoor	?5	Male	1	Sleeping in net
901	2	Idete	3	0130-0159	Indoor	?6	Male	1	Sleeping in net
901	2	Idete	3	0130-0159	Indoor	?6	Female	1	Sleeping in net
901	2	Idete	3	0130-0159	Indoor	?5	Male	1	Sleeping in net
901	2	Idete	3	0200-0229	Indoor	?6	Male	1	Sleeping in net
901	2	Idete	3	0200-0229	Indoor	?6	Female	1	Sleeping in net
901	2	Idete	3	0200-0229	Indoor	?5	Male	1	Sleeping in net
901	2	Idete	3	0230-0259	Indoor	?6	Male	1	Sleeping in net
901	2	Idete	3	0230-0259	Indoor	?6	Female	1	Sleeping in net
901	2	Idete	3	0230-0259	Indoor	?5	Male	1	Sleeping in net
901	2	Idete	3	0300-0329	Indoor	?6	Male	1	Sleeping in net
901	2	Idete	3	0300-0329	Indoor	?6	Female	1	Sleeping in net
901	2	Idete	3	0300-0329	Indoor	?5	Male	1	Sleeping in net
901	2	Idete	3	0330-0359	Indoor	?6	Male	1	Sleeping in net
901	2	Idete	3	0330-0359	Indoor	?6	Female	1	Sleeping in net
901	2	Idete	3	0330-0359	Indoor	?5	Male	1	Sleeping in net
901	2	Idete	3	0400-0429	Indoor	?6	Male	1	Sleeping in net
901	2	Idete	3	0400-0429	Indoor	?6	Female	1	Sleeping in net
901	2	Idete	3	0400-0429	Indoor	?5	Male	1	Sleeping in net
901	2	Idete	3	0430-0459	Indoor	?6	Male	1	Sleeping in net
901	2	Idete	3	0430-0459	Indoor	?6	Female	1	Sleeping in net
901	2	Idete	3	0430-0459	Indoor	?5	Male	1	Sleeping in net
901	2	Idete	3	0500-0529	Indoor	?6	Male	1	Sleeping in net
901	2	Idete	3	0500-0529	Indoor	?6	Female	1	Sleeping in net
901	2	Idete	3	0500-0529	Indoor	?5	Male	1	Sleeping in net
901	2	Idete	3	0530-0559	Indoor	?6	Male	1	Sleeping in net
901	2	Idete	3	0530-0559	Indoor	?6	Female	1	Sleeping in net
901	2	Idete	3	0530-0559	Indoor	?5	Male	1	Sleeping in net
901	2	Idete	3	0600-0629	Indoor	?5	Male	1	Sleeping in net
901	2	Idete	3	0600-0629	Outdoors	?6	Male	1	Resting
901	2	Idete	3	0600-0629	Outdoors	?6	Female	1	Sweeping
901	2	Idete	3	0630-0659	Outdoors	?6	Female	1	Doing laundry
901	2	Idete	3	0630-0659	Indoor	?6	Male	1	Reading/studying
901	2	Idete	3	0630-0659	Outdoors	?5	Male	1	Brushing teeth
902	2	Idete	5	1800-1829	Away	?6	Male	1	Away
902	2	Idete	5	1800-1829	Away	?6	Female	3	Away
902	2	Idete	5	1800-1829	Outdoors	?6	Male	1	Resting
902	2	Idete	5	1830-1859	Away	?6	Male	1	Away
902	2	Idete	5	1830-1859	Away	?6	Female	2	Away
902	2	Idete	5	1830-1859	Outdoors	?6	Male	1	Stories in net
902	2	Idete	5	1830-1859	Outdoors	?6	Female	1	walking/passing
902	2	Idete	5	1900-1929	Outdoors	?6	Female	1	Cooking
902	2	Idete	5	1900-1929	Outdoors	?6	Male	1	Resting
902	2	Idete	5	1900-1929	Outdoors	?6	Male	1	Fetching water
902	2	Idete	5	1900-1929	Outdoors	?6	Female	2	Fetching water
902	2	Idete	5	1930-1959	Away	?6	Female	1	Away
902	2	Idete	5	1930-1959	Outdoors	?6	Male	1	Resting
902	2	Idete	5	1930-1959	Outdoors	?6	Female	1	Resting
902	2	Idete	5	1930-1959	Outdoors	?6	Male	1	Doing laundry
902	2	Idete	5	1930-1959	Outdoors	?6	Female	1	Doing laundry
902	2	Idete	5	2000-2029	Outdoors	?6	Female	1	Cooking
902	2	Idete	5	2000-2029	Outdoors	?6	Male	1	Stories no net
902	2	Idete	5	2000-2029	Outdoors	?6	Female	1	Stories no net
902	2	Idete	5	2000-2029	Outdoors	?6	Male	1	Washing dishes
902	2	Idete	5	2000-2029	Outdoors	?6	Female	1	Bathing
902	2	Idete	5	2030-2059	Outdoors	?6	Male	1	Eating
902	2	Idete	5	2030-2059	Outdoors	?6	Female	3	Stories no net
902	2	Idete	5	2030-2059	Outdoors	?6	Male	1	Bathing
902	2	Idete	5	2100-2129	Outdoors	?6	Male	2	Stories no net
902	2	Idete	5	2100-2129	Outdoors	?6	Female	2	Stories no net
902	2	Idete	5	2100-2129	Outdoors	?6	Female	1	Sleeping no net
902	2	Idete	5	2130-2159	Outdoors	?6	Male	1	Stories no net
902	2	Idete	5	2130-2159	Outdoors	?6	Female	2	Stories no net
902	2	Idete	5	2130-2159	Indoor	?6	Male	1	Sleeping in net
902	2	Idete	5	2130-2159	Indoor	?6	Female	1	Sleeping in net
902	2	Idete	5	2200-2229	Indoor	?6	Male	1	Sleeping in net
902	2	Idete	5	2200-2229	Indoor	?6	Female	3	Sleeping in net
902	2	Idete	5	2200-2229	Outdoors	?6	Male	1	Resting
902	2	Idete	5	2230-2259	Indoor	?6	Male	2	Sleeping in net
902	2	Idete	5	2230-2259	Indoor	?6	Female	3	Sleeping in net
902	2	Idete	5	2300-2329	Indoor	?6	Male	2	Sleeping in net
902	2	Idete	5	2300-2329	Indoor	?6	Female	3	Sleeping in net
902	2	Idete	5	2330-2359	Indoor	?6	Male	2	Sleeping in net
902	2	Idete	5	2330-2359	Indoor	?6	Female	3	Sleeping in net
902	2	Idete	5	0000-0029	Indoor	?6	Male	2	Sleeping in net
902	2	Idete	5	0000-0029	Indoor	?6	Female	3	Sleeping in net
902	2	Idete	5	0030-0059	Indoor	?6	Male	2	Sleeping in net
902	2	Idete	5	0030-0059	Indoor	?6	Female	3	Sleeping in net
902	2	Idete	5	0100-0129	Indoor	?6	Male	2	Sleeping in net
902	2	Idete	5	0100-0129	Indoor	?6	Female	3	Sleeping in net
902	2	Idete	5	0130-0159	Indoor	?6	Male	2	Sleeping in net
902	2	Idete	5	0130-0159	Indoor	?6	Female	3	Sleeping in net
902	2	Idete	5	0200-0229	Indoor	?6	Male	2	Sleeping in net
902	2	Idete	5	0200-0229	Indoor	?6	Female	3	Sleeping in net
902	2	Idete	5	0230-0259	Indoor	?6	Male	2	Sleeping in net
902	2	Idete	5	0230-0259	Indoor	?6	Female	3	Sleeping in net
902	2	Idete	5	0300-0329	Indoor	?6	Male	2	Sleeping in net
902	2	Idete	5	0300-0329	Indoor	?6	Female	3	Sleeping in net
902	2	Idete	5	0330-0359	Indoor	?6	Male	2	Sleeping in net
902	2	Idete	5	0330-0359	Indoor	?6	Female	3	Sleeping in net
902	2	Idete	5	0400-0429	Indoor	?6	Male	2	Sleeping in net
902	2	Idete	5	0400-0429	Indoor	?6	Female	3	Sleeping in net
902	2	Idete	5	0430-0459	Indoor	?6	Male	2	Sleeping in net
902	2	Idete	5	0430-0459	Indoor	?6	Female	3	Sleeping in net
902	2	Idete	5	0500-0529	Indoor	?6	Male	2	Sleeping in net
902	2	Idete	5	0500-0529	Indoor	?6	Female	3	Sleeping in net
902	2	Idete	5	0530-0559	Indoor	?6	Male	1	Sleeping in net
902	2	Idete	5	0530-0559	Indoor	?6	Female	3	Sleeping in net
902	2	Idete	5	0530-0559	Outdoors	?6	Male	1	Resting
902	2	Idete	5	0600-0629	Outdoors	?6	Female	1	walking/passing
902	2	Idete	5	0600-0629	Indoor	?6	Male	1	Sleeping in net
902	2	Idete	5	0600-0629	Indoor	?6	Female	2	Sleeping in net
902	2	Idete	5	0600-0629	Outdoors	?6	Male	1	Resting
902	2	Idete	5	0630-0659	Outdoors	?6	Female	1	Washing dishes
902	2	Idete	5	0630-0659	Outdoors	?6	Female	1	Bathing
902	2	Idete	5	0630-0659	Outdoors	?6	Male	1	Resting
902	2	Idete	5	0630-0659	Outdoors	?6	Male	1	Sweeping
902	2	Idete	5	0630-0659	Outdoors	?6	Female	1	Sweeping
903	2	Idete	6	1800-1829	Away	?6	Male	1	Away
903	2	Idete	6	1800-1829	Outdoors	?6	Male	3	Playing
903	2	Idete	6	1800-1829	Outdoors	?6	Female	1	Washing dishes
903	2	Idete	6	1800-1829	Outdoors	?6	Male	1	Bathing
903	2	Idete	6	1830-1859	Away	?6	Female	1	Away
903	2	Idete	6	1830-1859	Outdoors	?6	Male	3	Playing
903	2	Idete	6	1830-1859	Outdoors	?6	Male	1	Reading/studying
903	2	Idete	6	1900-1929	Away	?6	Male	1	Away
903	2	Idete	6	1900-1929	Away	?6	Female	1	Away
903	2	Idete	6	1900-1929	Outdoors	?6	Female	1	Cooking
903	2	Idete	6	1900-1929	Outdoors	?6	Male	1	Bathing
903	2	Idete	6	1900-1929	Indoor	?6	Male	1	Sleeping in net
903	2	Idete	6	1900-1929	Outdoors	?6	Male	1	Resting
903	2	Idete	6	1930-1959	Away	?6	Female	1	Away
903	2	Idete	6	1930-1959	Outdoors	?6	Male	1	Bathing
903	2	Idete	6	1930-1959	Outdoors	?6	Male	3	Resting
903	2	Idete	6	1930-1959	Outdoors	?6	Female	1	Resting
903	2	Idete	6	2000-2029	Indoor	?6	Male	1	Eating
903	2	Idete	6	2000-2029	Outdoors	?6	Male	3	Eating
903	2	Idete	6	2000-2029	Outdoors	?6	Female	2	Eating
903	2	Idete	6	2030-2059	Indoor	?6	Male	3	Watching TV
903	2	Idete	6	2030-2059	Indoor	?6	Female	1	Watching TV
903	2	Idete	6	2030-2059	Outdoors	?6	Male	1	Resting
903	2	Idete	6	2030-2059	Outdoors	?6	Female	1	Resting
903	2	Idete	6	2100-2129	Indoor	?6	Male	3	Watching TV
903	2	Idete	6	2100-2129	Indoor	?6	Female	2	Watching TV
903	2	Idete	6	2100-2129	Outdoors	?6	Male	1	Resting
903	2	Idete	6	2130-2159	Indoor	?6	Male	3	Sleeping in net
903	2	Idete	6	2130-2159	Indoor	?6	Female	2	Sleeping in net
903	2	Idete	6	2130-2159	Indoor	?6	Male	1	Reading/studying
903	2	Idete	6	2200-2229	Indoor	?6	Male	4	Sleeping in net
903	2	Idete	6	2200-2229	Indoor	?6	Female	2	Sleeping in net
903	2	Idete	6	2230-2259	Indoor	?6	Male	4	Sleeping in net
903	2	Idete	6	2230-2259	Indoor	?6	Female	2	Sleeping in net
903	2	Idete	6	2300-2329	Indoor	?6	Male	4	Sleeping in net
903	2	Idete	6	2300-2329	Indoor	?6	Female	2	Sleeping in net
903	2	Idete	6	2330-2359	Indoor	?6	Male	4	Sleeping in net
903	2	Idete	6	2330-2359	Indoor	?6	Female	2	Sleeping in net
903	2	Idete	6	0000-0029	Indoor	?6	Male	4	Sleeping in net
903	2	Idete	6	0000-0029	Indoor	?6	Female	2	Sleeping in net
903	2	Idete	6	0030-0059	Indoor	?6	Male	4	Sleeping in net
903	2	Idete	6	0030-0059	Indoor	?6	Female	2	Sleeping in net
903	2	Idete	6	0100-0129	Indoor	?6	Male	4	Sleeping in net
903	2	Idete	6	0100-0129	Indoor	?6	Female	2	Sleeping in net
903	2	Idete	6	0130-0159	Indoor	?6	Male	4	Sleeping in net
903	2	Idete	6	0130-0159	Indoor	?6	Female	2	Sleeping in net
903	2	Idete	6	0200-0229	Indoor	?6	Male	4	Sleeping in net
903	2	Idete	6	0200-0229	Indoor	?6	Female	2	Sleeping in net
903	2	Idete	6	0230-0259	Indoor	?6	Male	4	Sleeping in net
903	2	Idete	6	0230-0259	Indoor	?6	Female	2	Sleeping in net
903	2	Idete	6	0300-0329	Indoor	?6	Male	4	Sleeping in net
903	2	Idete	6	0300-0329	Indoor	?6	Female	2	Sleeping in net
903	2	Idete	6	0330-0359	Indoor	?6	Male	4	Sleeping in net
903	2	Idete	6	0330-0359	Indoor	?6	Female	2	Sleeping in net
903	2	Idete	6	0400-0429	Indoor	?6	Male	4	Sleeping in net
903	2	Idete	6	0400-0429	Indoor	?6	Female	2	Sleeping in net
903	2	Idete	6	0430-0459	Indoor	?6	Male	4	Sleeping in net
903	2	Idete	6	0430-0459	Indoor	?6	Female	2	Sleeping in net
903	2	Idete	6	0500-0529	Indoor	?6	Male	4	Sleeping in net
903	2	Idete	6	0500-0529	Indoor	?6	Female	2	Sleeping in net
903	2	Idete	6	0530-0559	Indoor	?6	Male	4	Sleeping in net
903	2	Idete	6	0530-0559	Indoor	?6	Female	2	Sleeping in net
903	2	Idete	6	0600-0629	Indoor	?6	Male	4	Sleeping in net
903	2	Idete	6	0600-0629	Indoor	?6	Female	2	Sleeping in net
903	2	Idete	6	0630-0659	Away	?6	Male	3	Away
903	2	Idete	6	0630-0659	Away	?6	Female	1	Away
903	2	Idete	6	0630-0659	Outdoors	?6	Female	1	Washing dishes
903	2	Idete	6	0630-0659	Outdoors	?6	Male	1	Brushing teeth
904	2	Idete	7	1800-1829	Away	?6	Male	1	Away
904	2	Idete	7	1800-1829	Away	?6	Female	3	Away
904	2	Idete	7	1800-1829	Outdoors	?6	Male	2	Resting
904	2	Idete	7	1800-1829	Outdoors	?6	Female	1	Doing laundry
904	2	Idete	7	1830-1859	Away	?6	Male	1	Away
904	2	Idete	7	1830-1859	Away	?6	Female	1	Away
904	2	Idete	7	1830-1859	Indoor	?6	Female	1	Cooking
904	2	Idete	7	1830-1859	Outdoors	?6	Male	2	Stories no net
904	2	Idete	7	1830-1859	Outdoors	?6	Female	2	Stories no net
904	2	Idete	7	1900-1929	Away	?6	Female	1	Away
904	2	Idete	7	1900-1929	Indoor	?6	Female	1	Cooking
904	2	Idete	7	1900-1929	Outdoors	?6	Male	3	Stories no net
904	2	Idete	7	1900-1929	Outdoors	?6	Female	2	Stories no net
904	2	Idete	7	1930-1959	Away	?6	Male	2	Away
904	2	Idete	7	1930-1959	Away	?6	Female	2	Away
904	2	Idete	7	1930-1959	Indoor	?6	Female	1	Cooking
904	2	Idete	7	1930-1959	Outdoors	?6	Male	1	Stories no net
904	2	Idete	7	1930-1959	Outdoors	?6	Female	1	Stories no net
904	2	Idete	7	2000-2029	Away	?6	Male	2	Away
904	2	Idete	7	2000-2029	Away	?6	Female	1	Away
904	2	Idete	7	2000-2029	Indoor	?6	Female	1	Cooking
904	2	Idete	7	2000-2029	Outdoors	?6	Male	1	Stories no net
904	2	Idete	7	2000-2029	Outdoors	?6	Female	2	Stories no net
904	2	Idete	7	2030-2059	Away	?6	Male	1	Away
904	2	Idete	7	2030-2059	Away	?6	Female	1	Away
904	2	Idete	7	2030-2059	Indoor	?6	Female	1	Cooking
904	2	Idete	7	2030-2059	Outdoors	?6	Male	2	Stories no net
904	2	Idete	7	2030-2059	Outdoors	?6	Female	2	Stories no net
904	2	Idete	7	2100-2129	Away	?6	Male	1	Away
904	2	Idete	7	2100-2129	Away	?6	Female	1	Away
904	2	Idete	7	2100-2129	Indoor	?6	Female	1	Cooking
904	2	Idete	7	2100-2129	Outdoors	?6	Male	1	Stories no net
904	2	Idete	7	2100-2129	Outdoors	?6	Female	2	Stories no net
904	2	Idete	7	2100-2129	Outdoors	?6	Male	1	Resting
904	2	Idete	7	2130-2159	Outdoors	?6	Male	3	Eating
904	2	Idete	7	2130-2159	Outdoors	?6	Female	3	Eating
904	2	Idete	7	2130-2159	Outdoors	?6	Female	1	Resting
904	2	Idete	7	2200-2229	Away	?6	Female	1	Away
904	2	Idete	7	2200-2229	Indoor	?6	Male	2	Sleeping in net
904	2	Idete	7	2200-2229	Indoor	?6	Female	3	Sleeping in net
904	2	Idete	7	2200-2229	Outdoors	?6	Male	1	Reading/studying
904	2	Idete	7	2230-2259	Away	?6	Female	1	Away
904	2	Idete	7	2230-2259	Indoor	?6	Male	3	Sleeping in net
904	2	Idete	7	2230-2259	Indoor	?6	Female	3	Sleeping in net
904	2	Idete	7	2300-2329	Away	?6	Female	1	Away
904	2	Idete	7	2300-2329	Indoor	?6	Male	3	Sleeping in net
904	2	Idete	7	2300-2329	Indoor	?6	Female	3	Sleeping in net
904	2	Idete	7	2330-2359	Away	?6	Female	1	Away
904	2	Idete	7	2330-2359	Indoor	?6	Male	3	Sleeping in net
904	2	Idete	7	2330-2359	Indoor	?6	Female	3	Sleeping in net
904	2	Idete	7	0000-0029	Away	?6	Male	1	Away
904	2	Idete	7	0000-0029	Indoor	?6	Male	3	Sleeping in net
904	2	Idete	7	0000-0029	Indoor	?6	Female	3	Sleeping in net
904	2	Idete	7	0030-0059	Away	?6	Male	1	Away
904	2	Idete	7	0030-0059	Indoor	?6	Male	3	Sleeping in net
904	2	Idete	7	0030-0059	Indoor	?6	Female	3	Sleeping in net
904	2	Idete	7	0100-0129	Away	?6	Male	1	Away
904	2	Idete	7	0100-0129	Indoor	?6	Male	3	Sleeping in net
904	2	Idete	7	0100-0129	Indoor	?6	Female	3	Sleeping in net
904	2	Idete	7	0130-0159	Away	?6	Male	1	Away
904	2	Idete	7	0130-0159	Indoor	?6	Male	3	Sleeping in net
904	2	Idete	7	0130-0159	Indoor	?6	Female	3	Sleeping in net
904	2	Idete	7	0200-0229	Away	?6	Female	1	Away
904	2	Idete	7	0200-0229	Indoor	?6	Male	3	Sleeping in net
904	2	Idete	7	0200-0229	Indoor	?6	Female	3	Sleeping in net
904	2	Idete	7	0230-0259	Away	?6	Female	1	Away
904	2	Idete	7	0230-0259	Indoor	?6	Male	3	Sleeping in net
904	2	Idete	7	0230-0259	Indoor	?6	Female	3	Sleeping in net
904	2	Idete	7	0300-0329	Away	?6	Female	1	Away
904	2	Idete	7	0300-0329	Indoor	?6	Male	3	Sleeping in net
904	2	Idete	7	0300-0329	Indoor	?6	Female	3	Sleeping in net
904	2	Idete	7	0330-0359	Away	?6	Female	1	Away
904	2	Idete	7	0330-0359	Indoor	?6	Male	3	Sleeping in net
904	2	Idete	7	0330-0359	Indoor	?6	Female	3	Sleeping in net
904	2	Idete	7	0400-0429	Away	?6	Female	1	Away
904	2	Idete	7	0400-0429	Indoor	?6	Male	3	Sleeping in net
904	2	Idete	7	0400-0429	Indoor	?6	Female	3	Sleeping in net
904	2	Idete	7	0430-0459	Away	?6	Female	1	Away
904	2	Idete	7	0430-0459	Indoor	?6	Male	3	Sleeping in net
904	2	Idete	7	0430-0459	Indoor	?6	Female	3	Sleeping in net
904	2	Idete	7	0500-0529	Away	?6	Female	1	Away
904	2	Idete	7	0500-0529	Indoor	?6	Male	3	Sleeping in net
904	2	Idete	7	0500-0529	Indoor	?6	Female	3	Sleeping in net
904	2	Idete	7	0530-0559	Away	?6	Male	1	Away
904	2	Idete	7	0530-0559	Indoor	?6	Male	3	Sleeping in net
904	2	Idete	7	0530-0559	Indoor	?6	Female	3	Sleeping in net
904	2	Idete	7	0600-0629	Away	?6	Male	1	Away
904	2	Idete	7	0600-0629	Indoor	?6	Male	2	Sleeping in net
904	2	Idete	7	0600-0629	Indoor	?6	Female	3	Sleeping in net
904	2	Idete	7	0600-0629	Outdoors	?6	Male	1	Resting
904	2	Idete	7	0630-0659	Away	?6	Male	2	Away
904	2	Idete	7	0630-0659	Away	?6	Female	3	Away
904	2	Idete	7	0630-0659	Outdoors	?6	Male	1	Sweeping
904	2	Idete	7	0630-0659	Indoor	?6	Female	1	Sweeping
905	2	Idete	4	1800-1829	Away	?6	Male	2	Away
905	2	Idete	4	1800-1829	Away	?6	Female	1	Away
905	2	Idete	4	1800-1829	Outdoors	?6	Female	1	Stories no net
905	2	Idete	4	1830-1859	Away	?6	Male	2	Away
905	2	Idete	4	1830-1859	Away	?6	Female	1	Away
905	2	Idete	4	1830-1859	Outdoors	?6	Female	1	Doing laundry
905	2	Idete	4	1900-1929	Away	?6	Male	2	Away
905	2	Idete	4	1900-1929	Outdoors	?6	Female	1	Cooking
905	2	Idete	4	1900-1929	Outdoors	?6	Male	1	Stories no net
905	2	Idete	4	1930-1959	Away	?6	Male	2	Away
905	2	Idete	4	1930-1959	Outdoors	?6	Female	1	Cooking
905	2	Idete	4	1930-1959	Outdoors	?6	Male	1	Doing laundry
905	2	Idete	4	2000-2029	Away	?6	Male	2	Away
905	2	Idete	4	2000-2029	Outdoors	?6	Male	1	Cooking
905	2	Idete	4	2000-2029	Outdoors	?6	Female	1	Stories no net
905	2	Idete	4	2030-2059	Indoor	?6	Male	1	Playing
905	2	Idete	4	2030-2059	Indoor	?6	Female	1	Playing
905	2	Idete	4	2030-2059	Outdoors	?6	Male	1	Cooking
905	2	Idete	4	2030-2059	Outdoors	?6	Male	1	Stories in net
905	2	Idete	4	2100-2129	Indoor	?6	Male	2	Playing
905	2	Idete	4	2100-2129	Indoor	?6	Female	1	Playing
905	2	Idete	4	2100-2129	Outdoors	?6	Male	1	Stories no net
905	2	Idete	4	2130-2159	Indoor	?6	Male	3	Eating
905	2	Idete	4	2130-2159	Indoor	?6	Female	1	Eating
905	2	Idete	4	2200-2229	Away	?6	Male	2	Away
905	2	Idete	4	2200-2229	Outdoors	?6	Male	1	Stories no net
905	2	Idete	4	2200-2229	Indoor	?6	Female	1	Sleeping in net
905	2	Idete	4	2230-2259	Indoor	?6	Male	1	Bathing
905	2	Idete	4	2230-2259	Indoor	?6	Male	2	Sleeping in net
905	2	Idete	4	2230-2259	Indoor	?6	Female	1	Sleeping in net
905	2	Idete	4	2300-2329	Indoor	?6	Male	3	Sleeping in net
905	2	Idete	4	2300-2329	Indoor	?6	Female	1	Sleeping in net
905	2	Idete	4	2330-2359	Indoor	?6	Male	3	Sleeping in net
905	2	Idete	4	2330-2359	Indoor	?6	Female	1	Sleeping in net
905	2	Idete	4	0000-0029	Indoor	?6	Male	3	Sleeping in net
905	2	Idete	4	0000-0029	Indoor	?6	Female	1	Sleeping in net
905	2	Idete	4	0030-0059	Indoor	?6	Male	3	Sleeping in net
905	2	Idete	4	0030-0059	Indoor	?6	Female	1	Sleeping in net
905	2	Idete	4	0100-0129	Indoor	?6	Male	3	Sleeping in net
905	2	Idete	4	0100-0129	Indoor	?6	Female	1	Sleeping in net
905	2	Idete	4	0130-0159	Indoor	?6	Male	3	Sleeping in net
905	2	Idete	4	0130-0159	Indoor	?6	Female	1	Sleeping in net
905	2	Idete	4	0200-0229	Indoor	?6	Male	3	Sleeping in net
905	2	Idete	4	0200-0229	Indoor	?6	Female	1	Sleeping in net
905	2	Idete	4	0230-0259	Indoor	?6	Male	3	Sleeping in net
905	2	Idete	4	0230-0259	Indoor	?6	Female	1	Sleeping in net
905	2	Idete	4	0300-0329	Indoor	?6	Male	3	Sleeping in net
905	2	Idete	4	0300-0329	Indoor	?6	Female	1	Sleeping in net
905	2	Idete	4	0330-0359	Indoor	?6	Male	3	Sleeping in net
905	2	Idete	4	0330-0359	Indoor	?6	Female	1	Sleeping in net
905	2	Idete	4	0400-0429	Indoor	?6	Male	3	Sleeping in net
905	2	Idete	4	0400-0429	Indoor	?6	Female	1	Sleeping in net
905	2	Idete	4	0430-0459	Indoor	?6	Male	3	Sleeping in net
905	2	Idete	4	0430-0459	Indoor	?6	Female	1	Sleeping in net
905	2	Idete	4	0500-0529	Indoor	?6	Male	3	Sleeping in net
905	2	Idete	4	0500-0529	Indoor	?6	Female	1	Sleeping in net
905	2	Idete	4	0530-0559	Outdoors	?6	Female	1	Cooking
905	2	Idete	4	0530-0559	Outdoors	?6	Male	1	Stories no net
905	2	Idete	4	0530-0559	Indoor	?6	Male	2	Sleeping in net
905	2	Idete	4	0600-0629	Away	?6	Male	1	Away
905	2	Idete	4	0600-0629	Outdoors	?6	Female	1	Washing dishes
905	2	Idete	4	0600-0629	Indoor	?6	Male	1	Sleeping in net
905	2	Idete	4	0600-0629	Outdoors	?6	Male	1	Sweeping
905	2	Idete	4	0630-0659	Away	?6	Male	1	Away
905	2	Idete	4	0630-0659	Indoor	?6	Male	1	Sleeping in net
905	2	Idete	4	0630-0659	Outdoors	?6	Male	1	Doing laundry
905	2	Idete	4	0630-0659	Outdoors	?6	Female	1	Praying
906	2	Idete	8	1800-1829	Away	?6	Female	1	Away
906	2	Idete	8	1800-1829	Outdoors	?5	Male	2	Playing
906	2	Idete	8	1800-1829	Outdoors	?6	Female	3	Washing dishes
906	2	Idete	8	1800-1829	Indoor	?6	Male	1	Bathing
906	2	Idete	8	1800-1829	Outdoors	?6	Male	1	Reading/studying
906	2	Idete	8	1830-1859	Away	?6	Male	1	Away
906	2	Idete	8	1830-1859	Away	?6	Female	2	Away
906	2	Idete	8	1830-1859	Away	?5	Male	2	Away
906	2	Idete	8	1830-1859	Indoor	?6	Female	1	Cooking
906	2	Idete	8	1830-1859	Outdoors	?6	Female	1	Washing dishes
906	2	Idete	8	1830-1859	Indoor	?6	Male	1	Reading/studying
906	2	Idete	8	1900-1929	Away	?6	Male	1	Away
906	2	Idete	8	1900-1929	Away	?6	Female	2	Away
906	2	Idete	8	1900-1929	Indoor	?6	Female	2	Cooking
906	2	Idete	8	1900-1929	Indoor	?5	Male	2	Bathing
906	2	Idete	8	1900-1929	Outdoors	?6	Male	1	Reading/studying
906	2	Idete	8	1930-1959	Away	?6	Male	1	Away
906	2	Idete	8	1930-1959	Away	?6	Female	2	Away
906	2	Idete	8	1930-1959	Outdoors	?5	Male	2	Playing
906	2	Idete	8	1930-1959	Indoor	?6	Female	1	Cooking
906	2	Idete	8	1930-1959	Outdoors	?6	Female	1	Doing laundry
906	2	Idete	8	1930-1959	Outdoors	?6	Male	1	Reading/studying
906	2	Idete	8	2000-2029	Away	?6	Female	1	Away
906	2	Idete	8	2000-2029	Indoor	?6	Male	1	Eating
906	2	Idete	8	2000-2029	Indoor	?6	Female	3	Eating
906	2	Idete	8	2000-2029	Indoor	?5	Male	2	Eating
906	2	Idete	8	2000-2029	Outdoors	?6	Male	1	Reading/studying
906	2	Idete	8	2030-2059	Outdoors	?5	Male	2	Playing
906	2	Idete	8	2030-2059	Outdoors	?6	Male	1	Stories no net
906	2	Idete	8	2030-2059	Outdoors	?6	Female	4	Stories no net
906	2	Idete	8	2030-2059	Outdoors	?6	Male	1	Reading/studying
906	2	Idete	8	2100-2129	Away	?6	Female	2	Away
906	2	Idete	8	2100-2129	Indoor	?6	Female	1	Cooking
906	2	Idete	8	2100-2129	Indoor	?5	Male	2	Eating
906	2	Idete	8	2100-2129	Outdoors	?6	Male	1	Bathing
906	2	Idete	8	2100-2129	Outdoors	?6	Female	1	Bathing
906	2	Idete	8	2100-2129	Outdoors	?6	Male	1	Reading/studying
906	2	Idete	8	2130-2159	Away	?6	Female	1	Away
906	2	Idete	8	2130-2159	Indoor	?5	Male	2	Resting
906	2	Idete	8	2130-2159	Outdoors	?6	Female	3	Resting
906	2	Idete	8	2130-2159	Outdoors	?6	Male	1	Doing laundry
906	2	Idete	8	2130-2159	Outdoors	?6	Male	1	Reading/studying
906	2	Idete	8	2200-2229	Indoor	?6	Male	1	Sleeping in net
906	2	Idete	8	2200-2229	Indoor	?6	Female	4	Sleeping in net
906	2	Idete	8	2200-2229	Indoor	?5	Male	2	Sleeping in net
906	2	Idete	8	2200-2229	Indoor	?6	Male	1	Resting
906	2	Idete	8	2230-2259	Indoor	?6	Male	2	Sleeping in net
906	2	Idete	8	2230-2259	Indoor	?6	Female	4	Sleeping in net
906	2	Idete	8	2230-2259	Indoor	?5	Male	2	Sleeping in net
906	2	Idete	8	2300-2329	Indoor	?6	Male	2	Sleeping in net
906	2	Idete	8	2300-2329	Indoor	?6	Female	4	Sleeping in net
906	2	Idete	8	2300-2329	Indoor	?5	Male	2	Sleeping in net
906	2	Idete	8	2330-2359	Indoor	?6	Male	2	Sleeping in net
906	2	Idete	8	2330-2359	Indoor	?6	Female	4	Sleeping in net
906	2	Idete	8	2330-2359	Indoor	?5	Male	2	Sleeping in net
906	2	Idete	8	0000-0029	Indoor	?6	Male	2	Sleeping in net
906	2	Idete	8	0000-0029	Indoor	?6	Female	4	Sleeping in net
906	2	Idete	8	0000-0029	Indoor	?5	Male	2	Sleeping in net
906	2	Idete	8	0030-0059	Indoor	?6	Male	2	Sleeping in net
906	2	Idete	8	0030-0059	Indoor	?6	Female	4	Sleeping in net
906	2	Idete	8	0030-0059	Indoor	?5	Male	2	Sleeping in net
906	2	Idete	8	0100-0129	Indoor	?6	Male	2	Sleeping in net
906	2	Idete	8	0100-0129	Indoor	?6	Female	4	Sleeping in net
906	2	Idete	8	0100-0129	Indoor	?5	Male	2	Sleeping in net
906	2	Idete	8	0130-0159	Indoor	?6	Male	2	Sleeping in net
906	2	Idete	8	0130-0159	Indoor	?6	Female	4	Sleeping in net
906	2	Idete	8	0130-0159	Indoor	?5	Male	2	Sleeping in net
906	2	Idete	8	0200-0229	Indoor	?6	Male	2	Sleeping in net
906	2	Idete	8	0200-0229	Indoor	?6	Female	4	Sleeping in net
906	2	Idete	8	0200-0229	Indoor	?5	Male	2	Sleeping in net
906	2	Idete	8	0230-0259	Indoor	?6	Male	2	Sleeping in net
906	2	Idete	8	0230-0259	Indoor	?6	Female	4	Sleeping in net
906	2	Idete	8	0230-0259	Indoor	?5	Male	2	Sleeping in net
906	2	Idete	8	0300-0329	Indoor	?6	Male	2	Sleeping in net
906	2	Idete	8	0300-0329	Indoor	?6	Female	4	Sleeping in net
906	2	Idete	8	0300-0329	Indoor	?5	Male	2	Sleeping in net
906	2	Idete	8	0330-0359	Indoor	?6	Male	2	Sleeping in net
906	2	Idete	8	0330-0359	Indoor	?6	Female	4	Sleeping in net
906	2	Idete	8	0330-0359	Indoor	?5	Male	2	Sleeping in net
906	2	Idete	8	0400-0429	Indoor	?6	Male	2	Sleeping in net
906	2	Idete	8	0400-0429	Indoor	?6	Female	4	Sleeping in net
906	2	Idete	8	0400-0429	Indoor	?5	Male	2	Sleeping in net
906	2	Idete	8	0430-0459	Indoor	?6	Male	2	Sleeping in net
906	2	Idete	8	0430-0459	Indoor	?6	Female	4	Sleeping in net
906	2	Idete	8	0430-0459	Indoor	?5	Male	2	Sleeping in net
906	2	Idete	8	0500-0529	Indoor	?6	Male	2	Sleeping in net
906	2	Idete	8	0500-0529	Indoor	?6	Female	4	Sleeping in net
906	2	Idete	8	0500-0529	Indoor	?5	Male	2	Sleeping in net
906	2	Idete	8	0530-0559	Indoor	?6	Male	2	Sleeping in net
906	2	Idete	8	0530-0559	Indoor	?6	Female	4	Sleeping in net
906	2	Idete	8	0600-0629	Away	?6	Male	1	Away
906	2	Idete	8	0600-0629	Away	?6	Female	1	Away
906	2	Idete	8	0600-0629	Outdoors	?5	Male	2	Playing
906	2	Idete	8	0600-0629	Outdoors	?6	Male	2	Washing dishes
906	2	Idete	8	0600-0629	Outdoors	?6	Female	1	Doing laundry
906	2	Idete	8	0600-0629	Outdoors	?6	Male	1	Reading/studying
906	2	Idete	8	0630-0659	Away	?6	Female	1	Away
906	2	Idete	8	0630-0659	Away	?5	Male	1	Away
906	2	Idete	8	0630-0659	Outdoors	?6	Male	1	Cooking
906	2	Idete	8	0630-0659	Outdoors	?6	Female	2	Resting
906	2	Idete	8	0630-0659	Outdoors	?6	Female	1	Braiding hair
906	2	Idete	8	0630-0659	Outdoors	?6	Male	1	Reading/studying
906	2	Idete	8	0630-0659	Outdoors	?5	Male	1	Reading/studying
907	2	Idete	4	1800-1829	Away	?6	Female	1	Away
907	2	Idete	4	1800-1829	Outdoors	?5	Male	1	Playing
907	2	Idete	4	1800-1829	Outdoors	?6	Female	1	Washing dishes
907	2	Idete	4	1800-1829	Outdoors	?6	Male	1	Resting
907	2	Idete	4	1830-1859	Away	?6	Female	1	Away
907	2	Idete	4	1830-1859	Away	?5	Male	1	Away
907	2	Idete	4	1830-1859	Outdoors	?6	Female	1	Cooking
907	2	Idete	4	1830-1859	Outdoors	?6	Male	1	Resting
907	2	Idete	4	1900-1929	Outdoors	?6	Male	1	Bathing
907	2	Idete	4	1900-1929	Outdoors	?5	Male	1	Bathing
907	2	Idete	4	1900-1929	Outdoors	?6	Male	1	Resting
907	2	Idete	4	1900-1929	Outdoors	?6	Female	1	Resting
907	2	Idete	4	1930-1959	Outdoors	?5	Male	1	Watching TV
907	2	Idete	4	1930-1959	Outdoors	?6	Male	1	Resting
907	2	Idete	4	1930-1959	Outdoors	?6	Female	2	Resting
907	2	Idete	4	2000-2029	Outdoors	?6	Male	1	Stories no net
907	2	Idete	4	2000-2029	Outdoors	?6	Female	2	Stories no net
907	2	Idete	4	2000-2029	Outdoors	?5	Male	1	Watching TV
907	2	Idete	4	2030-2059	Outdoors	?6	Female	2	Eating
907	2	Idete	4	2030-2059	Outdoors	?5	Male	1	Eating
907	2	Idete	4	2030-2059	Outdoors	?6	Male	1	Resting
907	2	Idete	4	2100-2129	Outdoors	?5	Male	1	Playing
907	2	Idete	4	2100-2129	Outdoors	?6	Male	1	Eating
907	2	Idete	4	2100-2129	Outdoors	?6	Female	1	Taking dishes inside
907	2	Idete	4	2100-2129	Outdoors	?6	Female	1	Taking clothes inside
907	2	Idete	4	2130-2159	Indoor	?6	Female	1	Stories in net
907	2	Idete	4	2130-2159	Indoor	?5	Male	1	Stories in net
907	2	Idete	4	2130-2159	Indoor	?6	Female	1	Sleeping in net
907	2	Idete	4	2130-2159	Outdoors	?6	Male	1	Resting
907	2	Idete	4	2200-2229	Indoor	?6	Female	2	Sleeping in net
907	2	Idete	4	2200-2229	Indoor	?5	Male	1	Sleeping in net
907	2	Idete	4	2200-2229	Outdoors	?6	Male	1	Resting
907	2	Idete	4	2230-2259	Indoor	?6	Male	1	Sleeping in net
907	2	Idete	4	2230-2259	Indoor	?6	Female	2	Sleeping in net
907	2	Idete	4	2230-2259	Indoor	?5	Male	1	Sleeping in net
907	2	Idete	4	2300-2329	Indoor	?6	Male	1	Sleeping in net
907	2	Idete	4	2300-2329	Indoor	?6	Female	2	Sleeping in net
907	2	Idete	4	2300-2329	Indoor	?5	Male	1	Sleeping in net
907	2	Idete	4	2330-2359	Indoor	?6	Male	1	Sleeping in net
907	2	Idete	4	2330-2359	Indoor	?6	Female	2	Sleeping in net
907	2	Idete	4	2330-2359	Indoor	?5	Male	1	Sleeping in net
907	2	Idete	4	0000-0029	Indoor	?6	Male	1	Sleeping in net
907	2	Idete	4	0000-0029	Indoor	?6	Female	2	Sleeping in net
907	2	Idete	4	0000-0029	Indoor	?5	Male	1	Sleeping in net
907	2	Idete	4	0030-0059	Indoor	?6	Male	1	Sleeping in net
907	2	Idete	4	0030-0059	Indoor	?6	Female	2	Sleeping in net
907	2	Idete	4	0030-0059	Indoor	?5	Male	1	Sleeping in net
907	2	Idete	4	0100-0129	Indoor	?6	Male	1	Sleeping in net
907	2	Idete	4	0100-0129	Indoor	?6	Female	2	Sleeping in net
907	2	Idete	4	0100-0129	Indoor	?5	Male	1	Sleeping in net
907	2	Idete	4	0130-0159	Indoor	?6	Male	1	Sleeping in net
907	2	Idete	4	0130-0159	Indoor	?6	Female	2	Sleeping in net
907	2	Idete	4	0130-0159	Indoor	?5	Male	1	Sleeping in net
907	2	Idete	4	0200-0229	Indoor	?6	Male	1	Sleeping in net
907	2	Idete	4	0200-0229	Indoor	?6	Female	2	Sleeping in net
907	2	Idete	4	0200-0229	Indoor	?5	Male	1	Sleeping in net
907	2	Idete	4	0230-0259	Indoor	?6	Male	1	Sleeping in net
907	2	Idete	4	0230-0259	Indoor	?6	Female	2	Sleeping in net
907	2	Idete	4	0230-0259	Indoor	?5	Male	1	Sleeping in net
907	2	Idete	4	0300-0329	Indoor	?6	Male	1	Sleeping in net
907	2	Idete	4	0300-0329	Indoor	?6	Female	2	Sleeping in net
907	2	Idete	4	0300-0329	Indoor	?5	Male	1	Sleeping in net
907	2	Idete	4	0330-0359	Indoor	?6	Male	1	Sleeping in net
907	2	Idete	4	0330-0359	Indoor	?6	Female	2	Sleeping in net
907	2	Idete	4	0330-0359	Indoor	?5	Male	1	Sleeping in net
907	2	Idete	4	0400-0429	Indoor	?6	Male	1	Sleeping in net
907	2	Idete	4	0400-0429	Indoor	?6	Female	2	Sleeping in net
907	2	Idete	4	0400-0429	Indoor	?5	Male	1	Sleeping in net
907	2	Idete	4	0430-0459	Indoor	?6	Male	1	Sleeping in net
907	2	Idete	4	0430-0459	Indoor	?6	Female	2	Sleeping in net
907	2	Idete	4	0430-0459	Indoor	?5	Male	1	Sleeping in net
907	2	Idete	4	0500-0529	Indoor	?6	Male	1	Sleeping in net
907	2	Idete	4	0500-0529	Indoor	?6	Female	2	Sleeping in net
907	2	Idete	4	0500-0529	Indoor	?5	Male	1	Sleeping in net
907	2	Idete	4	0530-0559	Indoor	?6	Male	1	Sleeping in net
907	2	Idete	4	0530-0559	Indoor	?6	Female	2	Sleeping in net
907	2	Idete	4	0530-0559	Indoor	?5	Male	1	Sleeping in net
907	2	Idete	4	0600-0629	Indoor	?6	Female	1	Sleeping in net
907	2	Idete	4	0600-0629	Indoor	?5	Male	1	Sleeping in net
907	2	Idete	4	0600-0629	Outdoors	?6	Female	1	Sweeping
907	2	Idete	4	0600-0629	Outdoors	?6	Female	1	Washing face
907	2	Idete	4	0630-0659	Away	?6	Female	1	Away
907	2	Idete	4	0630-0659	Outdoors	?6	Female	1	Bathing
907	2	Idete	4	0630-0659	Indoor	?5	Male	1	Sleeping in net
907	2	Idete	4	0630-0659	Outdoors	?6	Male	1	Resting
908	2	Idete	4	1800-1829	Away	?5	Male	1	Away
908	2	Idete	4	1800-1829	Outdoors	?5	Female	1	Playing
908	2	Idete	4	1800-1829	Outdoors	?6	Female	1	walking/passing
908	2	Idete	4	1800-1829	Outdoors	?6	Male	1	Reading/studying
908	2	Idete	4	1830-1859	Away	?6	Female	1	Away
908	2	Idete	4	1830-1859	Away	?5	Male	1	Away
908	2	Idete	4	1830-1859	Away	?5	Female	1	Away
908	2	Idete	4	1830-1859	Outdoors	?6	Male	1	Resting
908	2	Idete	4	1900-1929	Outdoors	?5	Male	1	Playing
908	2	Idete	4	1900-1929	Outdoors	?5	Female	1	Playing
908	2	Idete	4	1900-1929	Outdoors	?6	Female	1	Washing dishes
908	2	Idete	4	1900-1929	Indoor	?6	Male	1	Bathing
908	2	Idete	4	1930-1959	Indoor	?6	Female	1	Cooking
908	2	Idete	4	1930-1959	Indoor	?5	Male	1	Resting
908	2	Idete	4	1930-1959	Indoor	?5	Female	1	Resting
908	2	Idete	4	1930-1959	Outdoors	?6	Male	1	Fetching water
908	2	Idete	4	2000-2029	Indoor	?5	Male	1	Eating
908	2	Idete	4	2000-2029	Indoor	?5	Female	1	Eating
908	2	Idete	4	2000-2029	Outdoors	?6	Male	1	Stories no net
908	2	Idete	4	2000-2029	Indoor	?6	Female	1	Weaving mats
908	2	Idete	4	2030-2059	Indoor	?6	Male	1	Eating
908	2	Idete	4	2030-2059	Indoor	?6	Female	1	Eating
908	2	Idete	4	2030-2059	Indoor	?5	Male	1	Baby carried/rocked
908	2	Idete	4	2030-2059	Indoor	?5	Female	1	Baby carried/rocked
908	2	Idete	4	2100-2129	Indoor	?5	Male	1	Sleeping in net
908	2	Idete	4	2100-2129	Indoor	?5	Female	1	Sleeping in net
908	2	Idete	4	2100-2129	Indoor	?6	Male	1	Resting
908	2	Idete	4	2100-2129	Indoor	?6	Female	1	Resting
908	2	Idete	4	2130-2159	Indoor	?6	Female	1	Sleeping in net
908	2	Idete	4	2130-2159	Indoor	?5	Male	1	Sleeping in net
908	2	Idete	4	2130-2159	Indoor	?5	Female	1	Sleeping in net
908	2	Idete	4	2130-2159	Indoor	?6	Male	1	Resting
908	2	Idete	4	2200-2229	Indoor	?6	Male	1	Sleeping in net
908	2	Idete	4	2200-2229	Indoor	?6	Female	1	Sleeping in net
908	2	Idete	4	2200-2229	Indoor	?5	Male	1	Sleeping in net
908	2	Idete	4	2200-2229	Indoor	?5	Female	1	Sleeping in net
908	2	Idete	4	2230-2259	Indoor	?6	Male	1	Sleeping in net
908	2	Idete	4	2230-2259	Indoor	?6	Female	1	Sleeping in net
908	2	Idete	4	2230-2259	Indoor	?5	Male	1	Sleeping in net
908	2	Idete	4	2230-2259	Indoor	?5	Female	1	Sleeping in net
908	2	Idete	4	2300-2329	Indoor	?6	Male	1	Sleeping in net
908	2	Idete	4	2300-2329	Indoor	?6	Female	1	Sleeping in net
908	2	Idete	4	2300-2329	Indoor	?5	Male	1	Sleeping in net
908	2	Idete	4	2300-2329	Indoor	?5	Female	1	Sleeping in net
908	2	Idete	4	2330-2359	Indoor	?6	Male	1	Sleeping in net
908	2	Idete	4	2330-2359	Indoor	?6	Female	1	Sleeping in net
908	2	Idete	4	2330-2359	Indoor	?5	Male	1	Sleeping in net
908	2	Idete	4	2330-2359	Indoor	?5	Female	1	Sleeping in net
908	2	Idete	4	0000-0029	Indoor	?6	Male	1	Sleeping in net
908	2	Idete	4	0000-0029	Indoor	?6	Female	1	Sleeping in net
908	2	Idete	4	0000-0029	Indoor	?5	Male	1	Sleeping in net
908	2	Idete	4	0000-0029	Indoor	?5	Female	1	Sleeping in net
908	2	Idete	4	0030-0059	Indoor	?6	Male	1	Sleeping in net
908	2	Idete	4	0030-0059	Indoor	?6	Female	1	Sleeping in net
908	2	Idete	4	0030-0059	Indoor	?5	Male	1	Sleeping in net
908	2	Idete	4	0030-0059	Indoor	?5	Female	1	Sleeping in net
908	2	Idete	4	0100-0129	Indoor	?6	Male	1	Sleeping in net
908	2	Idete	4	0100-0129	Indoor	?6	Female	1	Sleeping in net
908	2	Idete	4	0100-0129	Indoor	?5	Male	1	Sleeping in net
908	2	Idete	4	0100-0129	Indoor	?5	Female	1	Sleeping in net
908	2	Idete	4	0130-0159	Indoor	?6	Male	1	Sleeping in net
908	2	Idete	4	0130-0159	Indoor	?6	Female	1	Sleeping in net
908	2	Idete	4	0130-0159	Indoor	?5	Male	1	Sleeping in net
908	2	Idete	4	0130-0159	Indoor	?5	Female	1	Sleeping in net
908	2	Idete	4	0200-0229	Indoor	?6	Male	1	Sleeping in net
908	2	Idete	4	0200-0229	Indoor	?6	Female	1	Sleeping in net
908	2	Idete	4	0200-0229	Indoor	?5	Male	1	Sleeping in net
908	2	Idete	4	0200-0229	Indoor	?5	Female	1	Sleeping in net
908	2	Idete	4	0230-0259	Indoor	?6	Male	1	Sleeping in net
908	2	Idete	4	0230-0259	Indoor	?6	Female	1	Sleeping in net
908	2	Idete	4	0230-0259	Indoor	?5	Male	1	Sleeping in net
908	2	Idete	4	0230-0259	Indoor	?5	Female	1	Sleeping in net
908	2	Idete	4	0300-0329	Indoor	?6	Male	1	Sleeping in net
908	2	Idete	4	0300-0329	Indoor	?6	Female	1	Sleeping in net
908	2	Idete	4	0300-0329	Indoor	?5	Male	1	Sleeping in net
908	2	Idete	4	0300-0329	Indoor	?5	Female	1	Sleeping in net
908	2	Idete	4	0330-0359	Indoor	?6	Male	1	Sleeping in net
908	2	Idete	4	0330-0359	Indoor	?6	Female	1	Sleeping in net
908	2	Idete	4	0330-0359	Indoor	?5	Male	1	Sleeping in net
908	2	Idete	4	0330-0359	Indoor	?5	Female	1	Sleeping in net
908	2	Idete	4	0400-0429	Indoor	?6	Male	1	Sleeping in net
908	2	Idete	4	0400-0429	Indoor	?6	Female	1	Sleeping in net
908	2	Idete	4	0400-0429	Indoor	?5	Male	1	Sleeping in net
908	2	Idete	4	0400-0429	Indoor	?5	Female	1	Sleeping in net
908	2	Idete	4	0430-0459	Indoor	?6	Male	1	Sleeping in net
908	2	Idete	4	0430-0459	Indoor	?6	Female	1	Sleeping in net
908	2	Idete	4	0430-0459	Indoor	?5	Male	1	Sleeping in net
908	2	Idete	4	0430-0459	Indoor	?5	Female	1	Sleeping in net
908	2	Idete	4	0500-0529	Indoor	?6	Male	1	Sleeping in net
908	2	Idete	4	0500-0529	Indoor	?6	Female	1	Sleeping in net
908	2	Idete	4	0500-0529	Indoor	?5	Male	1	Sleeping in net
908	2	Idete	4	0500-0529	Indoor	?5	Female	1	Sleeping in net
908	2	Idete	4	0530-0559	Indoor	?6	Male	1	Sleeping in net
908	2	Idete	4	0530-0559	Indoor	?6	Female	1	Sleeping in net
908	2	Idete	4	0530-0559	Indoor	?5	Male	1	Sleeping in net
908	2	Idete	4	0530-0559	Indoor	?5	Female	1	Sleeping in net
908	2	Idete	4	0600-0629	Indoor	?5	Male	1	Sleeping in net
908	2	Idete	4	0600-0629	Indoor	?5	Female	1	Sleeping in net
908	2	Idete	4	0600-0629	Outdoors	?6	Male	1	Fetching water
908	2	Idete	4	0600-0629	Outdoors	?6	Female	1	Fetching water
908	2	Idete	4	0630-0659	Outdoors	?5	Male	1	walking/passing
908	2	Idete	4	0630-0659	Outdoors	?5	Female	1	walking/passing
908	2	Idete	4	0630-0659	Indoor	?6	Male	1	Bathing
908	2	Idete	4	0630-0659	Outdoors	?6	Female	1	Fetching water
909	2	Idete	7	1800-1829	Away	?6	Female	3	Away
909	2	Idete	7	1800-1829	Away	?5	Male	1	Away
909	2	Idete	7	1800-1829	Outdoors	?6	Male	1	Stories no net
909	2	Idete	7	1800-1829	Outdoors	?6	Female	2	Stories no net
909	2	Idete	7	1830-1859	Away	?6	Female	3	Away
909	2	Idete	7	1830-1859	Away	?5	Male	1	Away
909	2	Idete	7	1830-1859	Outdoors	?6	Female	2	Stories no net
909	2	Idete	7	1830-1859	Outdoors	?6	Male	1	Reading/studying
909	2	Idete	7	1900-1929	Away	?6	Female	3	Away
909	2	Idete	7	1900-1929	Away	?5	Male	1	Away
909	2	Idete	7	1900-1929	Indoor	?6	Female	1	Cooking
909	2	Idete	7	1900-1929	Outdoors	?6	Female	1	Stories no net
909	2	Idete	7	1900-1929	Outdoors	?6	Male	1	Reading/studying
909	2	Idete	7	1930-1959	Outdoors	?5	Male	1	Playing
909	2	Idete	7	1930-1959	Indoor	?6	Female	1	Cooking
909	2	Idete	7	1930-1959	Outdoors	?6	Female	4	Stories no net
909	2	Idete	7	1930-1959	Outdoors	?6	Male	1	Reading/studying
909	2	Idete	7	2000-2029	Indoor	?6	Female	1	Cooking
909	2	Idete	7	2000-2029	Outdoors	?5	Male	1	Eating
909	2	Idete	7	2000-2029	Outdoors	?6	Female	4	Stories no net
909	2	Idete	7	2000-2029	Outdoors	?6	Male	1	Reading/studying
909	2	Idete	7	2030-2059	Outdoors	?6	Male	1	Eating
909	2	Idete	7	2030-2059	Outdoors	?6	Female	5	Eating
909	2	Idete	7	2030-2059	Indoor	?5	Male	1	Sleeping in net
909	2	Idete	7	2100-2129	Outdoors	?6	Female	3	Stories no net
909	2	Idete	7	2100-2129	Outdoors	?6	Female	1	Bathing
909	2	Idete	7	2100-2129	Indoor	?5	Male	1	Sleeping in net
909	2	Idete	7	2100-2129	Outdoors	?6	Male	1	Reading/studying
909	2	Idete	7	2100-2129	Outdoors	?6	Female	1	Reading/studying
909	2	Idete	7	2130-2159	Outdoors	?6	Female	3	Stories no net
909	2	Idete	7	2130-2159	Outdoors	?6	Female	1	Bathing
909	2	Idete	7	2130-2159	Indoor	?5	Male	1	Sleeping in net
909	2	Idete	7	2130-2159	Outdoors	?6	Male	1	Reading/studying
909	2	Idete	7	2130-2159	Outdoors	?6	Female	1	Reading/studying
909	2	Idete	7	2200-2229	Indoor	?6	Female	5	Sleeping in net
909	2	Idete	7	2200-2229	Indoor	?5	Male	1	Sleeping in net
909	2	Idete	7	2200-2229	Outdoors	?6	Male	1	Reading/studying
909	2	Idete	7	2230-2259	Indoor	?6	Male	1	Sleeping in net
909	2	Idete	7	2230-2259	Indoor	?6	Female	5	Sleeping in net
909	2	Idete	7	2230-2259	Indoor	?5	Male	1	Sleeping in net
909	2	Idete	7	2300-2329	Indoor	?6	Male	1	Sleeping in net
909	2	Idete	7	2300-2329	Indoor	?6	Female	5	Sleeping in net
909	2	Idete	7	2300-2329	Indoor	?5	Male	1	Sleeping in net
909	2	Idete	7	2330-2359	Indoor	?6	Male	1	Sleeping in net
909	2	Idete	7	2330-2359	Indoor	?6	Female	5	Sleeping in net
909	2	Idete	7	2330-2359	Indoor	?5	Male	1	Sleeping in net
909	2	Idete	7	0000-0029	Indoor	?6	Male	1	Sleeping in net
909	2	Idete	7	0000-0029	Indoor	?6	Female	5	Sleeping in net
909	2	Idete	7	0000-0029	Indoor	?5	Male	1	Sleeping in net
909	2	Idete	7	0030-0059	Indoor	?6	Male	1	Sleeping in net
909	2	Idete	7	0030-0059	Indoor	?6	Female	5	Sleeping in net
909	2	Idete	7	0030-0059	Indoor	?5	Male	1	Sleeping in net
909	2	Idete	7	0100-0129	Indoor	?6	Male	1	Sleeping in net
909	2	Idete	7	0100-0129	Indoor	?6	Female	5	Sleeping in net
909	2	Idete	7	0100-0129	Indoor	?5	Male	1	Sleeping in net
909	2	Idete	7	0130-0159	Indoor	?6	Male	1	Sleeping in net
909	2	Idete	7	0130-0159	Indoor	?6	Female	5	Sleeping in net
909	2	Idete	7	0130-0159	Indoor	?5	Male	1	Sleeping in net
909	2	Idete	7	0200-0229	Indoor	?6	Male	1	Sleeping in net
909	2	Idete	7	0200-0229	Indoor	?6	Female	5	Sleeping in net
909	2	Idete	7	0200-0229	Indoor	?5	Male	1	Sleeping in net
909	2	Idete	7	0230-0259	Indoor	?6	Male	1	Sleeping in net
909	2	Idete	7	0230-0259	Indoor	?6	Female	5	Sleeping in net
909	2	Idete	7	0230-0259	Indoor	?5	Male	1	Sleeping in net
909	2	Idete	7	0300-0329	Indoor	?6	Male	1	Sleeping in net
909	2	Idete	7	0300-0329	Indoor	?6	Female	5	Sleeping in net
909	2	Idete	7	0300-0329	Indoor	?5	Male	1	Sleeping in net
909	2	Idete	7	0330-0359	Indoor	?6	Male	1	Sleeping in net
909	2	Idete	7	0330-0359	Indoor	?6	Female	5	Sleeping in net
909	2	Idete	7	0330-0359	Indoor	?5	Male	1	Sleeping in net
909	2	Idete	7	0400-0429	Indoor	?6	Male	1	Sleeping in net
909	2	Idete	7	0400-0429	Indoor	?6	Female	5	Sleeping in net
909	2	Idete	7	0400-0429	Indoor	?5	Male	1	Sleeping in net
909	2	Idete	7	0430-0459	Indoor	?6	Male	1	Sleeping in net
909	2	Idete	7	0430-0459	Indoor	?6	Female	5	Sleeping in net
909	2	Idete	7	0430-0459	Indoor	?5	Male	1	Sleeping in net
909	2	Idete	7	0500-0529	Indoor	?6	Female	5	Sleeping in net
909	2	Idete	7	0500-0529	Indoor	?5	Male	1	Sleeping in net
909	2	Idete	7	0500-0529	Outdoors	?6	Male	1	Reading/studying
909	2	Idete	7	0530-0559	Indoor	?6	Female	2	Sleeping in net
909	2	Idete	7	0530-0559	Indoor	?5	Male	1	Sleeping in net
909	2	Idete	7	0530-0559	Outdoors	?6	Male	1	Reading/studying
909	2	Idete	7	0530-0559	Outdoors	?6	Female	3	Fetching water
909	2	Idete	7	0600-0629	Away	?6	Female	1	Away
909	2	Idete	7	0600-0629	Indoor	?6	Female	1	Sleeping in net
909	2	Idete	7	0600-0629	Indoor	?5	Male	1	Sleeping in net
909	2	Idete	7	0600-0629	Outdoors	?6	Male	1	Reading/studying
909	2	Idete	7	0600-0629	Outdoors	?6	Female	3	Sweeping
909	2	Idete	7	0630-0659	Away	?6	Female	1	Away
909	2	Idete	7	0630-0659	Outdoors	?5	Male	1	Playing
909	2	Idete	7	0630-0659	Outdoors	?6	Female	1	walking/passing
909	2	Idete	7	0630-0659	Outdoors	?6	Female	2	Washing dishes
909	2	Idete	7	0630-0659	Outdoors	?6	Female	1	Doing laundry
909	2	Idete	7	0630-0659	Outdoors	?6	Male	1	Reading/studying
910	2	Idete	5	1800-1829	Away	?6	Male	1	Away
910	2	Idete	5	1800-1829	Outdoors	?5	Female	1	Playing
910	2	Idete	5	1800-1829	Outdoors	?6	Male	1	Stories no net
910	2	Idete	5	1800-1829	Outdoors	?6	Female	1	Resting
910	2	Idete	5	1800-1829	Outdoors	?6	Female	1	Fetching water
910	2	Idete	5	1830-1859	Outdoors	?5	Female	1	Playing
910	2	Idete	5	1830-1859	Outdoors	?6	Female	1	Cooking
910	2	Idete	5	1830-1859	Indoor	?6	Male	1	Bathing
910	2	Idete	5	1830-1859	Indoor	?6	Female	1	Resting
910	2	Idete	5	1830-1859	Outdoors	?6	Male	1	Reading/studying
910	2	Idete	5	1900-1929	Away	?6	Male	1	Away
910	2	Idete	5	1900-1929	Outdoors	?5	Female	1	Stories no net
910	2	Idete	5	1900-1929	Indoor	?6	Female	1	Sleeping in net
910	2	Idete	5	1900-1929	Outdoors	?6	Female	1	Resting
910	2	Idete	5	1900-1929	Outdoors	?6	Male	1	Reading/studying
910	2	Idete	5	1930-1959	Away	?6	Male	1	Away
910	2	Idete	5	1930-1959	Outdoors	?6	Female	1	Cooking
910	2	Idete	5	1930-1959	Outdoors	?5	Female	1	Eating
910	2	Idete	5	1930-1959	Outdoors	?6	Female	1	Washing dishes
910	2	Idete	5	1930-1959	Outdoors	?6	Male	1	Reading/studying
910	2	Idete	5	2000-2029	Outdoors	?6	Male	1	Stories no net
910	2	Idete	5	2000-2029	Outdoors	?6	Female	1	Stories no net
910	2	Idete	5	2000-2029	Indoor	?6	Male	1	Bathing
910	2	Idete	5	2000-2029	Indoor	?6	Female	1	Sleeping in net
910	2	Idete	5	2000-2029	Indoor	?5	Female	1	Sleeping in net
910	2	Idete	5	2030-2059	Outdoors	?6	Male	2	Eating
910	2	Idete	5	2030-2059	Outdoors	?6	Female	1	Eating
910	2	Idete	5	2030-2059	Indoor	?6	Female	1	Sleeping in net
910	2	Idete	5	2030-2059	Indoor	?5	Female	1	Sleeping in net
910	2	Idete	5	2100-2129	Indoor	?6	Female	1	Bathing
910	2	Idete	5	2100-2129	Indoor	?6	Male	1	Sleeping in net
910	2	Idete	5	2100-2129	Indoor	?6	Female	1	Sleeping in net
910	2	Idete	5	2100-2129	Indoor	?5	Female	1	Sleeping in net
910	2	Idete	5	2100-2129	Outdoors	?6	Male	1	Reading/studying
910	2	Idete	5	2130-2159	Indoor	?6	Male	1	Sleeping in net
910	2	Idete	5	2130-2159	Indoor	?6	Female	2	Sleeping in net
910	2	Idete	5	2130-2159	Indoor	?5	Female	1	Sleeping in net
910	2	Idete	5	2130-2159	Outdoors	?6	Male	1	Reading/studying
910	2	Idete	5	2200-2229	Indoor	?6	Male	2	Sleeping in net
910	2	Idete	5	2200-2229	Indoor	?6	Female	2	Sleeping in net
910	2	Idete	5	2200-2229	Indoor	?5	Female	1	Sleeping in net
910	2	Idete	5	2230-2259	Indoor	?6	Male	2	Sleeping in net
910	2	Idete	5	2230-2259	Indoor	?6	Female	2	Sleeping in net
910	2	Idete	5	2230-2259	Indoor	?5	Female	1	Sleeping in net
910	2	Idete	5	2300-2329	Indoor	?6	Male	2	Sleeping in net
910	2	Idete	5	2300-2329	Indoor	?6	Female	2	Sleeping in net
910	2	Idete	5	2300-2329	Indoor	?5	Female	1	Sleeping in net
910	2	Idete	5	2330-2359	Indoor	?6	Male	2	Sleeping in net
910	2	Idete	5	2330-2359	Indoor	?6	Female	2	Sleeping in net
910	2	Idete	5	2330-2359	Indoor	?5	Male	1	Sleeping in net
910	2	Idete	5	0000-0029	Indoor	?6	Male	2	Sleeping in net
910	2	Idete	5	0000-0029	Indoor	?6	Female	2	Sleeping in net
910	2	Idete	5	0000-0029	Indoor	?5	Female	1	Sleeping in net
910	2	Idete	5	0030-0059	Indoor	?6	Male	2	Sleeping in net
910	2	Idete	5	0030-0059	Indoor	?6	Female	2	Sleeping in net
910	2	Idete	5	0030-0059	Indoor	?5	Male	1	Sleeping in net
910	2	Idete	5	0100-0129	Indoor	?6	Male	2	Sleeping in net
910	2	Idete	5	0100-0129	Indoor	?6	Female	2	Sleeping in net
910	2	Idete	5	0100-0129	Indoor	?5	Female	1	Sleeping in net
910	2	Idete	5	0130-0159	Indoor	?6	Male	2	Sleeping in net
910	2	Idete	5	0130-0159	Indoor	?6	Female	2	Sleeping in net
910	2	Idete	5	0130-0159	Indoor	?5	Female	1	Sleeping in net
910	2	Idete	5	0200-0229	Indoor	?6	Male	2	Sleeping in net
910	2	Idete	5	0200-0229	Indoor	?6	Female	2	Sleeping in net
910	2	Idete	5	0200-0229	Indoor	?5	Female	1	Sleeping in net
910	2	Idete	5	0230-0259	Indoor	?6	Male	2	Sleeping in net
910	2	Idete	5	0230-0259	Indoor	?6	Female	2	Sleeping in net
910	2	Idete	5	0230-0259	Indoor	?5	Female	1	Sleeping in net
910	2	Idete	5	0300-0329	Indoor	?6	Male	2	Sleeping in net
910	2	Idete	5	0300-0329	Indoor	?6	Female	2	Sleeping in net
910	2	Idete	5	0300-0329	Indoor	?5	Female	1	Sleeping in net
910	2	Idete	5	0330-0359	Indoor	?6	Male	2	Sleeping in net
910	2	Idete	5	0330-0359	Indoor	?6	Female	2	Sleeping in net
910	2	Idete	5	0330-0359	Indoor	?5	Female	1	Sleeping in net
910	2	Idete	5	0400-0429	Indoor	?6	Male	2	Sleeping in net
910	2	Idete	5	0400-0429	Indoor	?6	Female	2	Sleeping in net
910	2	Idete	5	0400-0429	Indoor	?5	Female	1	Sleeping in net
910	2	Idete	5	0430-0459	Indoor	?6	Male	2	Sleeping in net
910	2	Idete	5	0430-0459	Indoor	?6	Female	2	Sleeping in net
910	2	Idete	5	0430-0459	Indoor	?5	Female	1	Sleeping in net
910	2	Idete	5	0500-0529	Indoor	?6	Male	2	Sleeping in net
910	2	Idete	5	0500-0529	Indoor	?6	Female	2	Sleeping in net
910	2	Idete	5	0500-0529	Indoor	?5	Female	1	Sleeping in net
910	2	Idete	5	0530-0559	Indoor	?6	Male	1	Sleeping in net
910	2	Idete	5	0530-0559	Indoor	?6	Female	2	Sleeping in net
910	2	Idete	5	0530-0559	Indoor	?5	Female	1	Sleeping in net
910	2	Idete	5	0530-0559	Indoor	?6	Male	1	Reading/studying
910	2	Idete	5	0600-0629	Indoor	?6	Male	1	Stories in net
910	2	Idete	5	0600-0629	Indoor	?6	Female	1	Stories in net
910	2	Idete	5	0600-0629	Indoor	?6	Male	1	Sleeping in net
910	2	Idete	5	0600-0629	Indoor	?6	Female	1	Sleeping in net
910	2	Idete	5	0600-0629	Indoor	?5	Female	1	Sleeping in net
910	2	Idete	5	0630-0659	Indoor	?6	Female	1	Sleeping in net
910	2	Idete	5	0630-0659	Indoor	?5	Female	1	Sleeping in net
910	2	Idete	5	0630-0659	Indoor	?6	Male	1	Reading/studying
910	2	Idete	5	0630-0659	Outdoors	?6	Female	1	Sweeping
901	3	Idete	3	1800-1829	Outdoors	?5	Male	1	Playing
901	3	Idete	3	1800-1829	Outdoors	?6	Female	1	Cooking
901	3	Idete	3	1800-1829	Outdoors	?6	Male	1	Reading/studying
901	3	Idete	3	1830-1859	Outdoors	?5	Male	1	Playing
901	3	Idete	3	1830-1859	Outdoors	?6	Female	1	Cooking
901	3	Idete	3	1830-1859	Outdoors	?6	Male	1	Reading/studying
901	3	Idete	3	1900-1929	Outdoors	?6	Female	1	Washing dishes
901	3	Idete	3	1900-1929	Outdoors	?5	Male	1	Bathing
901	3	Idete	3	1900-1929	Outdoors	?6	Male	1	Reading/studying
901	3	Idete	3	1930-1959	Outdoors	?6	Male	1	Eating
901	3	Idete	3	1930-1959	Outdoors	?6	Female	1	Eating
901	3	Idete	3	1930-1959	Outdoors	?5	Male	1	Eating
901	3	Idete	3	2000-2029	Indoor	?5	Male	1	Sleeping in net
901	3	Idete	3	2000-2029	Outdoors	?6	Female	1	Resting
901	3	Idete	3	2000-2029	Outdoors	?6	Male	1	Reading/studying
901	3	Idete	3	2030-2059	Indoor	?5	Male	1	Sleeping in net
901	3	Idete	3	2030-2059	Outdoors	?6	Female	1	Resting
901	3	Idete	3	2030-2059	Outdoors	?6	Male	1	Reading/studying
901	3	Idete	3	2100-2129	Indoor	?6	Male	1	Bathing
901	3	Idete	3	2100-2129	Indoor	?5	Male	1	Sleeping in net
901	3	Idete	3	2100-2129	Outdoors	?6	Female	1	Resting
901	3	Idete	3	2130-2159	Indoor	?6	Female	1	Sleeping in net
901	3	Idete	3	2130-2159	Indoor	?5	Male	1	Sleeping in net
901	3	Idete	3	2130-2159	Outdoors	?6	Male	1	Resting
901	3	Idete	3	2200-2229	Indoor	?6	Female	1	Sleeping in net
901	3	Idete	3	2200-2229	Indoor	?5	Male	1	Sleeping in net
901	3	Idete	3	2200-2229	Outdoors	?6	Male	1	Resting
901	3	Idete	3	2230-2259	Indoor	?6	Female	1	Sleeping in net
901	3	Idete	3	2230-2259	Indoor	?5	Male	1	Sleeping in net
901	3	Idete	3	2230-2259	Indoor	?6	Male	1	Resting
901	3	Idete	3	2300-2329	Indoor	?6	Female	1	Sleeping in net
901	3	Idete	3	2300-2329	Indoor	?5	Male	1	Sleeping in net
901	3	Idete	3	2300-2329	Indoor	?6	Male	1	Reading/studying
901	3	Idete	3	2330-2359	Indoor	?6	Male	1	Sleeping in net
901	3	Idete	3	2330-2359	Indoor	?6	Female	1	Sleeping in net
901	3	Idete	3	2330-2359	Indoor	?5	Male	1	Sleeping in net
901	3	Idete	3	0000-0029	Indoor	?6	Male	1	Sleeping in net
901	3	Idete	3	0000-0029	Indoor	?6	Female	1	Sleeping in net
901	3	Idete	3	0000-0029	Indoor	?5	Male	1	Sleeping in net
901	3	Idete	3	0030-0059	Indoor	?6	Male	1	Sleeping in net
901	3	Idete	3	0030-0059	Indoor	?6	Female	1	Sleeping in net
901	3	Idete	3	0030-0059	Indoor	?5	Male	1	Sleeping in net
901	3	Idete	3	0100-0129	Indoor	?6	Male	1	Sleeping in net
901	3	Idete	3	0100-0129	Indoor	?6	Female	1	Sleeping in net
901	3	Idete	3	0100-0129	Indoor	?5	Male	1	Sleeping in net
901	3	Idete	3	0130-0159	Indoor	?6	Male	1	Sleeping in net
901	3	Idete	3	0130-0159	Indoor	?6	Female	1	Sleeping in net
901	3	Idete	3	0130-0159	Indoor	?5	Male	1	Sleeping in net
901	3	Idete	3	0200-0229	Indoor	?6	Male	1	Sleeping in net
901	3	Idete	3	0200-0229	Indoor	?6	Female	1	Sleeping in net
901	3	Idete	3	0200-0229	Indoor	?5	Male	1	Sleeping in net
901	3	Idete	3	0230-0259	Indoor	?6	Male	1	Sleeping in net
901	3	Idete	3	0230-0259	Indoor	?6	Female	1	Sleeping in net
901	3	Idete	3	0230-0259	Indoor	?5	Male	1	Sleeping in net
901	3	Idete	3	0300-0329	Indoor	?6	Male	1	Sleeping in net
901	3	Idete	3	0300-0329	Indoor	?6	Female	1	Sleeping in net
901	3	Idete	3	0300-0329	Indoor	?5	Male	1	Sleeping in net
901	3	Idete	3	0330-0359	Indoor	?6	Male	1	Sleeping in net
901	3	Idete	3	0330-0359	Indoor	?6	Female	1	Sleeping in net
901	3	Idete	3	0330-0359	Indoor	?5	Male	1	Sleeping in net
901	3	Idete	3	0400-0429	Indoor	?6	Male	1	Sleeping in net
901	3	Idete	3	0400-0429	Indoor	?6	Female	1	Sleeping in net
901	3	Idete	3	0400-0429	Indoor	?5	Male	1	Sleeping in net
901	3	Idete	3	0430-0459	Indoor	?6	Male	1	Sleeping in net
901	3	Idete	3	0430-0459	Indoor	?6	Female	1	Sleeping in net
901	3	Idete	3	0430-0459	Indoor	?5	Male	1	Sleeping in net
901	3	Idete	3	0500-0529	Indoor	?6	Female	1	Sleeping in net
901	3	Idete	3	0500-0529	Indoor	?5	Male	1	Sleeping in net
901	3	Idete	3	0500-0529	Indoor	?6	Male	1	Reading/studying
901	3	Idete	3	0530-0559	Indoor	?6	Female	1	Sleeping in net
901	3	Idete	3	0530-0559	Indoor	?5	Male	1	Sleeping in net
901	3	Idete	3	0530-0559	Indoor	?6	Male	1	Reading/studying
901	3	Idete	3	0600-0629	Outdoors	?5	Male	1	Brushing teeth
901	3	Idete	3	0600-0629	Outdoors	?6	Male	1	Brushing teeth
901	3	Idete	3	0600-0629	Indoor	?6	Female	1	Sweeping
901	3	Idete	3	0630-0659	Outdoors	?5	Male	1	Playing
901	3	Idete	3	0630-0659	Indoor	?6	Male	1	Reading/studying
901	3	Idete	3	0630-0659	Outdoors	?6	Female	1	Sweeping
902	3	Idete	5	1800-1829	Away	?6	Female	2	Away
902	3	Idete	5	1800-1829	Outdoors	?6	Female	1	Playing
902	3	Idete	5	1800-1829	Outdoors	?6	Male	1	Resting
902	3	Idete	5	1800-1829	Outdoors	?6	Female	1	Resting
902	3	Idete	5	1830-1859	Away	?6	Female	1	Away
902	3	Idete	5	1830-1859	Outdoors	?6	Female	1	Playing
902	3	Idete	5	1830-1859	Outdoors	?6	Female	1	walking/passing
902	3	Idete	5	1830-1859	Outdoors	?6	Male	1	Resting
902	3	Idete	5	1830-1859	Outdoors	?6	Female	1	Resting
902	3	Idete	5	1900-1929	Outdoors	?6	Female	1	Cooking
902	3	Idete	5	1900-1929	Outdoors	?6	Male	1	Resting
902	3	Idete	5	1900-1929	Outdoors	?6	Male	1	Cutting firewood
902	3	Idete	5	1900-1929	Outdoors	?6	Male	1	Fetching water
902	3	Idete	5	1900-1929	Outdoors	?6	Female	1	Fetching water
902	3	Idete	5	1930-1959	Away	?6	Male	1	Away
902	3	Idete	5	1930-1959	Outdoors	?6	Female	2	Cooking
902	3	Idete	5	1930-1959	Outdoors	?6	Female	1	Stories no net
902	3	Idete	5	1930-1959	Outdoors	?6	Female	1	Resting
902	3	Idete	5	2000-2029	Outdoors	?5	Male	1	Stories no net
902	3	Idete	5	2000-2029	Outdoors	?5	Female	3	Stories no net
902	3	Idete	5	2000-2029	Outdoors	?6	Female	1	Bathing
902	3	Idete	5	2030-2059	Outdoors	?6	Male	1	Stories no net
902	3	Idete	5	2030-2059	Outdoors	?6	Female	3	Stories no net
902	3	Idete	5	2030-2059	Outdoors	?6	Male	1	Sleeping no net
902	3	Idete	5	2100-2129	Outdoors	?6	Female	2	Cooking
902	3	Idete	5	2100-2129	Outdoors	?6	Male	1	Sleeping no net
902	3	Idete	5	2100-2129	Outdoors	?6	Female	1	Sleeping no net
902	3	Idete	5	2100-2129	Outdoors	?6	Male	1	Resting
902	3	Idete	5	2130-2159	Outdoors	?6	Male	2	Eating
902	3	Idete	5	2130-2159	Outdoors	?6	Female	3	Eating
902	3	Idete	5	2200-2229	Outdoors	?6	Female	1	Bathing
902	3	Idete	5	2200-2229	Indoor	?6	Male	1	Sleeping in net
902	3	Idete	5	2200-2229	Indoor	?6	Female	1	Sleeping in net
902	3	Idete	5	2200-2229	Outdoors	?6	Female	1	Sleeping no net
902	3	Idete	5	2200-2229	Outdoors	?6	Male	1	Resting
902	3	Idete	5	2230-2259	Indoor	?6	Male	1	Sleeping in net
902	3	Idete	5	2230-2259	Indoor	?6	Female	3	Sleeping in net
902	3	Idete	5	2230-2259	Outdoors	?6	Male	1	Resting
902	3	Idete	5	2300-2329	Indoor	?6	Male	2	Sleeping in net
902	3	Idete	5	2300-2329	Indoor	?6	Female	3	Sleeping in net
902	3	Idete	5	2330-2359	Indoor	?6	Male	2	Sleeping in net
902	3	Idete	5	2330-2359	Indoor	?6	Female	3	Sleeping in net
902	3	Idete	5	0000-0029	Indoor	?6	Male	2	Sleeping in net
902	3	Idete	5	0000-0029	Indoor	?6	Female	3	Sleeping in net
902	3	Idete	5	0030-0059	Indoor	?6	Male	2	Sleeping in net
902	3	Idete	5	0030-0059	Indoor	?6	Female	3	Sleeping in net
902	3	Idete	5	0100-0129	Indoor	?6	Male	2	Sleeping in net
902	3	Idete	5	0100-0129	Indoor	?6	Female	3	Sleeping in net
902	3	Idete	5	0130-0159	Indoor	?6	Male	2	Sleeping in net
902	3	Idete	5	0130-0159	Indoor	?6	Female	3	Sleeping in net
902	3	Idete	5	0200-0229	Indoor	?6	Male	2	Sleeping in net
902	3	Idete	5	0200-0229	Indoor	?6	Female	3	Sleeping in net
902	3	Idete	5	0230-0259	Indoor	?6	Male	2	Sleeping in net
902	3	Idete	5	0230-0259	Indoor	?6	Female	3	Sleeping in net
902	3	Idete	5	0300-0329	Indoor	?6	Male	2	Sleeping in net
902	3	Idete	5	0300-0329	Indoor	?6	Female	3	Sleeping in net
902	3	Idete	5	0330-0359	Indoor	?6	Male	2	Sleeping in net
902	3	Idete	5	0330-0359	Indoor	?6	Female	3	Sleeping in net
902	3	Idete	5	0400-0429	Indoor	?6	Male	2	Sleeping in net
902	3	Idete	5	0400-0429	Indoor	?6	Female	3	Sleeping in net
902	3	Idete	5	0430-0459	Indoor	?6	Male	2	Sleeping in net
902	3	Idete	5	0430-0459	Indoor	?6	Female	3	Sleeping in net
902	3	Idete	5	0500-0529	Indoor	?6	Male	2	Sleeping in net
902	3	Idete	5	0500-0529	Indoor	?6	Female	3	Sleeping in net
902	3	Idete	5	0530-0559	Indoor	?6	Male	1	Sleeping in net
902	3	Idete	5	0530-0559	Indoor	?6	Female	3	Sleeping in net
902	3	Idete	5	0530-0559	Outdoors	?6	Male	1	Resting
902	3	Idete	5	0600-0629	Outdoors	?6	Female	1	Bathing
902	3	Idete	5	0600-0629	Outdoors	?6	Male	1	Resting
902	3	Idete	5	0600-0629	Outdoors	?6	Male	1	Sweeping
902	3	Idete	5	0600-0629	Outdoors	?6	Female	2	Washing faces
902	3	Idete	5	0630-0659	Away	?6	Male	1	Away
902	3	Idete	5	0630-0659	Away	?6	Female	1	Away
902	3	Idete	5	0630-0659	Outdoors	?6	Female	1	walking/passing
902	3	Idete	5	0630-0659	Outdoors	?6	Female	1	Washing dishes
902	3	Idete	5	0630-0659	Outdoors	?6	Male	1	Resting
903	3	Idete	6	1800-1829	Away	?6	Male	2	Away
903	3	Idete	6	1800-1829	Away	?6	Female	1	Away
903	3	Idete	6	1800-1829	Outdoors	?6	Male	1	Cooking
903	3	Idete	6	1800-1829	Outdoors	?6	Male	1	Washing dishes
903	3	Idete	6	1800-1829	Outdoors	?5	Female	1	Pearling coconut
903	3	Idete	6	1830-1859	Outdoors	?6	Male	3	Playing
903	3	Idete	6	1830-1859	Outdoors	?6	Female	1	Cooking
903	3	Idete	6	1830-1859	Outdoors	?6	Male	1	Resting
903	3	Idete	6	1830-1859	Outdoors	?6	Female	1	Resting
903	3	Idete	6	1900-1929	Outdoors	?6	Female	1	Cooking
903	3	Idete	6	1900-1929	Outdoors	?6	Male	4	Resting
903	3	Idete	6	1900-1929	Outdoors	?6	Female	1	Resting
903	3	Idete	6	1930-1959	Outdoors	?6	Male	2	Bathing
903	3	Idete	6	1930-1959	Outdoors	?6	Male	1	Resting
903	3	Idete	6	1930-1959	Outdoors	?6	Female	2	Resting
903	3	Idete	6	1930-1959	Outdoors	?6	Male	1	Reading/studying
903	3	Idete	6	2000-2029	Outdoors	?6	Male	4	Eating
903	3	Idete	6	2000-2029	Outdoors	?6	Female	1	Eating
903	3	Idete	6	2000-2029	Outdoors	?6	Female	1	Bathing
903	3	Idete	6	2030-2059	Indoor	?6	Male	3	Watching TV
903	3	Idete	6	2030-2059	Indoor	?6	Female	1	Watching TV
903	3	Idete	6	2030-2059	Outdoors	?6	Male	1	Watching TV
903	3	Idete	6	2030-2059	Outdoors	?6	Female	1	Watching TV
903	3	Idete	6	2100-2129	Indoor	?6	Male	3	Stories in net
903	3	Idete	6	2100-2129	Indoor	?6	Female	2	Stories in net
903	3	Idete	6	2100-2129	Outdoors	?6	Male	1	Reading/studying
903	3	Idete	6	2130-2159	Indoor	?6	Male	4	Sleeping in net
903	3	Idete	6	2130-2159	Indoor	?6	Female	2	Sleeping in net
903	3	Idete	6	2200-2229	Indoor	?6	Male	4	Sleeping in net
903	3	Idete	6	2200-2229	Indoor	?6	Female	2	Sleeping in net
903	3	Idete	6	2230-2259	Indoor	?6	Male	4	Sleeping in net
903	3	Idete	6	2230-2259	Indoor	?6	Female	2	Sleeping in net
903	3	Idete	6	2300-2329	Indoor	?6	Male	4	Sleeping in net
903	3	Idete	6	2300-2329	Indoor	?6	Female	2	Sleeping in net
903	3	Idete	6	2330-2359	Indoor	?6	Male	4	Sleeping in net
903	3	Idete	6	2330-2359	Indoor	?6	Female	2	Sleeping in net
903	3	Idete	6	0000-0029	Indoor	?6	Male	4	Sleeping in net
903	3	Idete	6	0000-0029	Indoor	?6	Female	2	Sleeping in net
903	3	Idete	6	0030-0059	Indoor	?6	Male	4	Sleeping in net
903	3	Idete	6	0030-0059	Indoor	?6	Female	2	Sleeping in net
903	3	Idete	6	0100-0129	Indoor	?6	Male	4	Sleeping in net
903	3	Idete	6	0100-0129	Indoor	?6	Female	2	Sleeping in net
903	3	Idete	6	0130-0159	Indoor	?6	Male	4	Sleeping in net
903	3	Idete	6	0130-0159	Indoor	?6	Female	2	Sleeping in net
903	3	Idete	6	0200-0229	Indoor	?6	Male	4	Sleeping in net
903	3	Idete	6	0200-0229	Indoor	?6	Female	2	Sleeping in net
903	3	Idete	6	0230-0259	Indoor	?6	Male	4	Sleeping in net
903	3	Idete	6	0230-0259	Indoor	?6	Female	2	Sleeping in net
903	3	Idete	6	0300-0329	Indoor	?6	Male	4	Sleeping in net
903	3	Idete	6	0300-0329	Indoor	?6	Female	2	Sleeping in net
903	3	Idete	6	0330-0359	Indoor	?6	Male	4	Sleeping in net
903	3	Idete	6	0330-0359	Indoor	?6	Female	2	Sleeping in net
903	3	Idete	6	0400-0429	Indoor	?6	Male	4	Sleeping in net
903	3	Idete	6	0400-0429	Indoor	?6	Female	2	Sleeping in net
903	3	Idete	6	0430-0459	Indoor	?6	Male	4	Sleeping in net
903	3	Idete	6	0430-0459	Indoor	?6	Female	2	Sleeping in net
903	3	Idete	6	0500-0529	Indoor	?6	Male	4	Sleeping in net
903	3	Idete	6	0500-0529	Indoor	?6	Female	2	Sleeping in net
903	3	Idete	6	0530-0559	Indoor	?6	Male	4	Sleeping in net
903	3	Idete	6	0530-0559	Indoor	?6	Female	2	Sleeping in net
903	3	Idete	6	0600-0629	Indoor	?6	Male	4	Sleeping in net
903	3	Idete	6	0600-0629	Indoor	?6	Female	2	Sleeping in net
903	3	Idete	6	0630-0659	Away	?6	Male	3	Away
903	3	Idete	6	0630-0659	Away	?6	Female	1	Away
903	3	Idete	6	0630-0659	Indoor	?6	Male	1	Sleeping in net
903	3	Idete	6	0630-0659	Indoor	?6	Male	1	Reading/studying
904	3	Idete	7	1800-1829	Away	?6	Male	2	Away
904	3	Idete	7	1800-1829	Outdoors	?6	Female	4	Stories no net
904	3	Idete	7	1800-1829	Outdoors	?6	Male	1	Resting
904	3	Idete	7	1830-1859	Away	?6	Male	2	Away
904	3	Idete	7	1830-1859	Away	?6	Female	1	Away
904	3	Idete	7	1830-1859	Outdoors	?6	Male	1	Stories no net
904	3	Idete	7	1830-1859	Outdoors	?6	Female	2	Stories no net
904	3	Idete	7	1830-1859	Indoor	?6	Female	1	Bathing
904	3	Idete	7	1900-1929	Away	?6	Male	1	Away
904	3	Idete	7	1900-1929	Indoor	?6	Female	1	Cooking
904	3	Idete	7	1900-1929	Outdoors	?6	Male	1	Stories no net
904	3	Idete	7	1900-1929	Outdoors	?6	Female	3	Stories no net
904	3	Idete	7	1900-1929	Outdoors	?6	Male	1	Feeding pigs
904	3	Idete	7	1930-1959	Away	?6	Male	1	Away
904	3	Idete	7	1930-1959	Away	?6	Female	2	Away
904	3	Idete	7	1930-1959	Indoor	?6	Female	1	Cooking
904	3	Idete	7	1930-1959	Outdoors	?6	Male	2	Stories no net
904	3	Idete	7	1930-1959	Outdoors	?6	Female	1	Stories no net
904	3	Idete	7	2000-2029	Away	?6	Male	2	Away
904	3	Idete	7	2000-2029	Away	?6	Female	2	Away
904	3	Idete	7	2000-2029	Indoor	?6	Female	1	Cooking
904	3	Idete	7	2000-2029	Outdoors	?6	Male	1	Resting
904	3	Idete	7	2000-2029	Outdoors	?6	Female	1	Doing laundry
904	3	Idete	7	2030-2059	Away	?6	Male	2	Away
904	3	Idete	7	2030-2059	Away	?6	Female	2	Away
904	3	Idete	7	2030-2059	Indoor	?6	Female	1	Cooking
904	3	Idete	7	2030-2059	Outdoors	?6	Male	1	Reading/studying
904	3	Idete	7	2030-2059	Outdoors	?6	Female	1	Reading/studying
904	3	Idete	7	2100-2129	Away	?6	Male	1	Away
904	3	Idete	7	2100-2129	Indoor	?6	Female	1	Cooking
904	3	Idete	7	2100-2129	Outdoors	?6	Male	1	Stories no net
904	3	Idete	7	2100-2129	Outdoors	?6	Female	2	Stories no net
904	3	Idete	7	2100-2129	Indoor	?6	Female	1	Sleeping in net
904	3	Idete	7	2100-2129	Outdoors	?6	Male	1	Reading/studying
904	3	Idete	7	2130-2159	Outdoors	?6	Male	3	Eating
904	3	Idete	7	2130-2159	Outdoors	?6	Female	4	Eating
904	3	Idete	7	2200-2229	Indoor	?6	Male	2	Sleeping in net
904	3	Idete	7	2200-2229	Indoor	?6	Female	4	Sleeping in net
904	3	Idete	7	2200-2229	Outdoors	?6	Male	1	Reading/studying
904	3	Idete	7	2230-2259	Indoor	?6	Male	3	Sleeping in net
904	3	Idete	7	2230-2259	Indoor	?6	Female	4	Sleeping in net
904	3	Idete	7	2300-2329	Indoor	?6	Male	3	Sleeping in net
904	3	Idete	7	2300-2329	Indoor	?6	Female	4	Sleeping in net
904	3	Idete	7	0000-0029	Indoor	?6	Male	3	Sleeping in net
904	3	Idete	7	0000-0029	Indoor	?6	Female	4	Sleeping in net
904	3	Idete	7	0030-0059	Indoor	?6	Male	3	Sleeping in net
904	3	Idete	7	0030-0059	Indoor	?6	Female	4	Sleeping in net
904	3	Idete	7	0100-0129	Indoor	?6	Male	3	Sleeping in net
904	3	Idete	7	0100-0129	Indoor	?6	Female	4	Sleeping in net
904	3	Idete	7	0130-0159	Indoor	?6	Male	3	Sleeping in net
904	3	Idete	7	0130-0159	Indoor	?6	Female	4	Sleeping in net
904	3	Idete	7	0200-0229	Indoor	?6	Male	3	Sleeping in net
904	3	Idete	7	0200-0229	Indoor	?6	Female	4	Sleeping in net
904	3	Idete	7	0230-0259	Indoor	?6	Male	3	Sleeping in net
904	3	Idete	7	0230-0259	Indoor	?6	Female	4	Sleeping in net
904	3	Idete	7	0300-0329	Indoor	?6	Male	3	Sleeping in net
904	3	Idete	7	0300-0329	Indoor	?6	Female	4	Sleeping in net
904	3	Idete	7	0330-0359	Indoor	?6	Male	3	Sleeping in net
904	3	Idete	7	0330-0359	Indoor	?6	Female	4	Sleeping in net
904	3	Idete	7	0400-0429	Indoor	?6	Male	3	Sleeping in net
904	3	Idete	7	0400-0429	Indoor	?6	Female	4	Sleeping in net
904	3	Idete	7	0430-0459	Indoor	?6	Male	3	Sleeping in net
904	3	Idete	7	0430-0459	Indoor	?6	Female	4	Sleeping in net
904	3	Idete	7	0500-0529	Indoor	?6	Male	3	Sleeping in net
904	3	Idete	7	0500-0529	Indoor	?6	Female	4	Sleeping in net
904	3	Idete	7	0530-0559	Indoor	?6	Male	3	Sleeping in net
904	3	Idete	7	0530-0559	Indoor	?6	Female	4	Sleeping in net
904	3	Idete	7	0600-0629	Indoor	?6	Male	2	Sleeping in net
904	3	Idete	7	0600-0629	Indoor	?6	Female	4	Sleeping in net
904	3	Idete	7	0600-0629	Outdoors	?6	Male	1	Resting
904	3	Idete	7	0630-0659	Away	?6	Male	2	Away
904	3	Idete	7	0630-0659	Away	?6	Female	3	Away
904	3	Idete	7	0630-0659	Indoor	?6	Female	1	Sweeping
904	3	Idete	7	0630-0659	Outdoors	?6	Male	1	Sweeping
905	3	Idete	4	1800-1829	Away	?6	Male	1	Away
905	3	Idete	4	1800-1829	Away	?6	Female	1	Away
905	3	Idete	4	1800-1829	Indoor	?6	Male	2	Stories no net
905	3	Idete	4	1830-1859	Away	?6	Male	2	Away
905	3	Idete	4	1830-1859	Away	?6	Female	1	Away
905	3	Idete	4	1830-1859	Outdoors	?6	Male	1	Resting
905	3	Idete	4	1900-1929	Outdoors	?6	Male	3	Stories no net
905	3	Idete	4	1900-1929	Outdoors	?6	Female	1	Stories no net
905	3	Idete	4	1930-1959	Away	?6	Male	1	Away
905	3	Idete	4	1930-1959	Outdoors	?6	Male	2	Playing
[truncated: 148,736 more rows]
